# Supplementary material for: The Evolution of the Exponent of Zipf's Law in Language Ontogeny
Source: PubMed Central journal article supplement (PMC3596411; doi:10.1371/journal.pone.0053227), 2013-03-13
Supplement: pone.0053227.s001.pdf [file pone.0053227.s001.pdf]

# Supplementary online information for 'The evolution of the exponent of Zipf's law in language ontogeny'

**Jaume Baixeries<sup>1,2</sup>, Brita Elvevåg<sup>3,4</sup>, Ramon Ferrer-i-Cancho<sup>2‡</sup>**

<sup>1</sup> LARCA Research Group

Departament de Llenguatges i Sistemes Informàtics,

Universitat Politècnica de Catalunya,

Barcelona, Catalonia (Spain)

<sup>2</sup> Complexity & Quantitative Linguistics Lab

Departament de Llenguatges i Sistemes Informàtics,

TALP Research Center, Universitat Politècnica de Catalunya,

Barcelona, Catalonia (Spain)

<sup>3</sup> Psychiatry Research Group,

Department of Clinical Medicine,

University of Tromsø,

Tromsø, Norway

<sup>4</sup> Norwegian Centre for Integrated Care and Telemedicine (NST),

University Hospital of North Norway,

Tromsø, Norway.

**Contents**

|          |                                                                                                                |           |
|----------|----------------------------------------------------------------------------------------------------------------|-----------|
| <b>1</b> | <b>Age ranges of target children</b>                                                                           | <b>3</b>  |
| <b>2</b> | <b>The cut-offs for normalization</b>                                                                          | <b>6</b>  |
| <b>3</b> | <b>Normalizations excluded from the main article</b>                                                           | <b>8</b>  |
| 3.1      | Normalization by prefix: additional tables with lower cut-offs . . . . .                                       | 8         |
| 3.1.1    | Dependencies of parameters with age . . . . .                                                                  | 8         |
| 3.1.2    | Dependencies between $\alpha$ and MLU . . . . .                                                                | 15        |
| 3.2      | Normalization by random sampling. . . . .                                                                      | 19        |
| 3.2.1    | Dependency of parameters with age . . . . .                                                                    | 19        |
| <b>4</b> | <b>The right-truncated zeta distribution: <math>\alpha = 1</math> versus free <math>\alpha</math></b>          | <b>27</b> |
| 4.1      | Normalization by constant length in words . . . . .                                                            | 28        |
| 4.2      | Normalization by constant number of different words . . . . .                                                  | 28        |
| 4.3      | Brief discussion . . . . .                                                                                     | 28        |
| <b>5</b> | <b>The range of variation of <math>\alpha</math>: further support for the evolution of <math>\alpha</math></b> | <b>38</b> |

**1. Age ranges of target children**

A summary of the age ranges of the target children included in our analyses is shown in Tables 1 for English, Table 2 for German and Table 3 for Dutch and Swedish.

**Table 1. Summary of age ranges of target children: English**

| Language | Corpus     | Target child | Age points | Initial age | Final age |
|----------|------------|--------------|------------|-------------|-----------|
| English  | Lara       | Lara         | 120        | 21.43       | 39.83     |
| English  | Bloom70    | Eric         | 3          | 20.23       | 22.90     |
| English  | Bloom70    | Peter        | 20         | 21.27       | 37.67     |
| English  | Brown      | Adam         | 55         | 27.13       | 62.40     |
| English  | Brown      | Eve          | 10         | 18.00       | 27.00     |
| English  | Brown      | Sarah        | 134        | 27.17       | 61.20     |
| English  | Kuczaj     | Abe          | 207        | 28.80       | 60.37     |
| English  | Macwhinney | Mark         | 31         | 41.87       | 66.80     |
| English  | Macwhinney | Ross         | 74         | 16.37       | 66.80     |
| English  | Macwhinney | Unknown1     | 1          | 64.50       | 64.50     |
| English  | Macwhinney | Unknown2     | 1          | 64.50       | 64.50     |
| English  | Manchester | Anne         | 35         | 22.23       | 33.33     |
| English  | Manchester | Aran         | 33         | 23.40       | 34.93     |
| English  | Manchester | Becky        | 34         | 24.23       | 35.50     |
| English  | Manchester | Carl         | 33         | 20.73       | 32.50     |
| English  | Manchester | Dominic      | 35         | 22.83       | 34.53     |
| English  | Manchester | Gail         | 34         | 23.90       | 35.40     |
| English  | Manchester | Joel         | 35         | 23.03       | 34.37     |
| English  | Manchester | John         | 32         | 23.50       | 34.80     |
| English  | Manchester | Liz          | 34         | 23.30       | 34.60     |
| English  | Manchester | Nicole       | 33         | 24.83       | 36.33     |
| English  | Manchester | Ruth         | 33         | 23.50       | 35.70     |
| English  | Manchester | Warren       | 36         | 22.20       | 33.67     |
| English  | Providence | Alex         | 51         | 16.93       | 41.53     |
| English  | Providence | Lily         | 80         | 13.07       | 48.07     |
| English  | Providence | Naima        | 87         | 11.93       | 46.33     |
| English  | Providence | Violet       | 51         | 14.00       | 47.80     |
| English  | Providence | William      | 44         | 16.33       | 40.50     |
| English  | Sachs      | Naomi        | 92         | 14.97       | 57.10     |
| English  | Suppes     | Nina         | 52         | 23.53       | 39.70     |
| English  | Wells      | Abigail      | 10         | 17.93       | 56.00     |
| English  | Wells      | Benjamin     | 10         | 17.70       | 60.80     |
| English  | Wells      | Betty        | 9          | 18.10       | 59.07     |
| English  | Wells      | Darren       | 10         | 18.07       | 58.20     |
| English  | Wells      | Debbie       | 16         | 18.30       | 47.93     |
| English  | Wells      | Ellen        | 10         | 17.87       | 57.73     |
| English  | Wells      | Elspeth      | 10         | 18.00       | 60.10     |
| English  | Wells      | Frances      | 10         | 18.03       | 58.27     |
| English  | Wells      | Gary         | 9          | 18.00       | 57.00     |
| English  | Wells      | Gavin        | 9          | 18.70       | 57.60     |
| English  | Wells      | Geoffrey     | 9          | 18.00       | 59.73     |
| English  | Wells      | Gerald       | 9          | 18.20       | 57.17     |
| English  | Wells      | Harriet      | 10         | 18.07       | 58.10     |
| English  | Wells      | Iris         | 9          | 18.00       | 56.13     |
| English  | Wells      | Jack         | 10         | 17.87       | 57.03     |
| English  | Wells      | Jason        | 10         | 18.00       | 60.63     |
| English  | Wells      | Jonathan     | 10         | 18.17       | 55.47     |
| English  | Wells      | Laura        | 9          | 18.03       | 42.07     |
| English  | Wells      | Lee          | 8          | 17.93       | 41.97     |
| English  | Wells      | Martin       | 9          | 17.87       | 41.93     |
| English  | Wells      | Nancy        | 8          | 18.07       | 39.10     |
| English  | Wells      | Neil         | 8          | 18.13       | 42.03     |
| English  | Wells      | Neville      | 9          | 17.83       | 41.90     |
| English  | Wells      | Olivia       | 9          | 18.00       | 41.73     |
| English  | Wells      | Penny        | 9          | 18.30       | 41.87     |
| English  | Wells      | Rosie        | 8          | 21.63       | 42.37     |
| English  | Wells      | Samantha     | 9          | 18.20       | 42.37     |
| English  | Wells      | Sean         | 1          | 18.37       | 18.37     |
| English  | Wells      | Sheila       | 9          | 21.07       | 42.83     |
| English  | Wells      | Simon        | 9          | 17.70       | 41.73     |
| English  | Wells      | Stella       | 8          | 18.27       | 42.00     |
| English  | Wells      | Tony         | 9          | 17.87       | 42.27     |

Ages are given in months. Only the names of the target children employed in our study are shown (target children with less than two time points are excluded). Age points refers to number of different ages before applying the filter that excludes transcripts from 5 years onwards (see Methods in the main article). Initial and final age refer to the age at which the study started and ended, respectively.

**Table 2. Summary of age ranges of target children: German**

| Language | Corpus   | Target child | Age points | Initial age | Final age |
|----------|----------|--------------|------------|-------------|-----------|
| German   | Caroline | Caroline     | 235        | 10.03       | 51.60     |
| German   | Leo      | Leo          | 494        | 23.40       | 59.17     |
| German   | Rigol    | Cosima       | 107        | 7.10        | 86.73     |
| German   | Rigol    | Pauline      | 97         | 11.53       | 95.10     |
| German   | Rigol    | Sebastian    | 91         | 16.07       | 89.37     |
| German   | Szagun   | Anna         | 22         | 16.17       | 43.90     |
| German   | Szagun   | Celina       | 5          | 16.03       | 34.43     |
| German   | Szagun   | Emely        | 27         | 16.20       | 44.10     |
| German   | Szagun   | Falko        | 22         | 16.00       | 44.07     |
| German   | Szagun   | Finng        | 5          | 16.17       | 34.80     |
| German   | Szagun   | Ina          | 5          | 16.00       | 31.40     |
| German   | Szagun   | Isabel       | 5          | 16.67       | 34.37     |
| German   | Szagun   | Jores        | 3          | 16.40       | 25.43     |
| German   | Szagun   | Konstantin   | 5          | 16.27       | 34.27     |
| German   | Szagun   | Leo          | 5          | 16.33       | 34.80     |
| German   | Szagun   | Leon         | 5          | 16.17       | 34.47     |
| German   | Szagun   | Lisa         | 22         | 15.97       | 43.73     |
| German   | Szagun   | Luisa        | 5          | 16.37       | 35.00     |
| German   | Szagun   | Mario        | 5          | 16.27       | 34.60     |
| German   | Szagun   | Marlou       | 2          | 16.30       | 34.43     |
| German   | Szagun   | Martin       | 7          | 16.40       | 34.47     |
| German   | Szagun   | Neele        | 5          | 15.33       | 34.50     |
| German   | Szagun   | Rahel        | 22         | 16.07       | 43.67     |
| German   | Szagun   | Sina         | 5          | 16.93       | 34.47     |
| German   | Szagun   | Sino         | 5          | 16.00       | 34.57     |
| German   | Szagun   | SRen         | 22         | 16.00       | 44.00     |

Format as in Table 1.

**Table 3. Summary of age ranges of target children: Dutch & Swedish**

| Language | Corpus        | Target child | Age points | Initial age | Final age |
|----------|---------------|--------------|------------|-------------|-----------|
| Dutch    | Groningen     | Abel         | 28         | 23.00       | 40.03     |
| Dutch    | Groningen     | Daan         | 34         | 20.70       | 40.00     |
| Dutch    | Groningen     | Josse        | 28         | 24.23       | 40.57     |
| Dutch    | Groningen     | Matthijs     | 42         | 22.43       | 43.07     |
| Dutch    | Groningen     | Peter        | 27         | 17.30       | 32.73     |
| Dutch    | Groningen     | Tomas        | 26         | 19.17       | 37.07     |
| Dutch    | Schaerlaekens | Arnold       | 13         | 22.60       | 37.23     |
| Dutch    | Schaerlaekens | Diederik     | 13         | 22.60       | 37.23     |
| Dutch    | Schaerlaekens | Gijs         | 12         | 20.97       | 34.77     |
| Dutch    | Schaerlaekens | Joost        | 12         | 20.97       | 34.77     |
| Dutch    | Schaerlaekens | Katelijne    | 12         | 20.97       | 34.77     |
| Dutch    | Schaerlaekens | Maria        | 13         | 22.60       | 37.23     |
| Dutch    | Vankampen     | Laura        | 78         | 21.13       | 66.40     |
| Dutch    | Vankampen     | Sarah        | 50         | 18.53       | 62.43     |
| Swedish  | Goteborg      | Anton        | 40         | 23.27       | 47.97     |
| Swedish  | Goteborg      | Harry        | 40         | 18.67       | 47.77     |
| Swedish  | Goteborg      | Markus       | 26         | 15.63       | 33.97     |
| Swedish  | Goteborg      | Bel          | 32         | 18.30       | 41.30     |
| Swedish  | Goteborg      | Tea          | 34         | 18.33       | 47.77     |

Format as in Table 1.

## 2. The cut-offs for normalization

The cut-offs for normalization,  $T^*$  (by length) and  $n^*$  (by observed vocabulary size), were chosen based upon the summary of the raw statistics of  $T$  and  $n$  in Tables 4 and 5. We focused on the major classes of roles: 'target child', 'father', 'mother' and 'investigator'.  $T^* = 500$  and  $n^* = 100$  were chosen for being round lower bounds to the smallest mean  $T$  and the smallest mean  $n$ , respectively, among the major classes of roles at the level of all languages mixed (i.e. the mean  $T$  and the mean  $n$  of investigators).  $T^*$  and  $n^*$  were then halved to increase the number of participants and the number of ages considered for each participant, yielding  $T^* = 250$  and  $n^* = 50$ .

**Table 4. Analysis of the variation  $T$ , the total number of words.**

| Language | Role class     | $N$ | $T$               |                   |                   |                  |
|----------|----------------|-----|-------------------|-------------------|-------------------|------------------|
|          |                |     | $min$             | $mean$            | $max$             | $dev$            |
| All      | Target child   | 101 | 287.76 ± 296.19   | 1052.17 ± 780.19  | 2123.83 ± 1610.10 | 508.07 ± 395.50  |
| All      | Father         | 24  | 86.79 ± 169.94    | 800.64 ± 733.05   | 2213.25 ± 1688.97 | 611.28 ± 443.48  |
| All      | Investigator   | 45  | 180.07 ± 383.62   | 583.03 ± 784.56   | 1297.80 ± 1371.12 | 320.18 ± 314.57  |
| All      | Mother         | 47  | 870.62 ± 983.34   | 2317.41 ± 1234.92 | 4297.34 ± 2097.48 | 771.72 ± 408.88  |
| All      | Other adults   | 43  | 42.79 ± 87.31     | 368.67 ± 489.59   | 1013.98 ± 1239.08 | 302.28 ± 356.11  |
| All      | Other children | 21  | 43.29 ± 37.89     | 227.45 ± 199.65   | 647.76 ± 819.70   | 209.90 ± 319.53  |
| All      | Remainder      | 8   | 12.50 ± 6.28      | 71.25 ± 47.12     | 352.62 ± 379.02   | 90.54 ± 88.37    |
| Dutch    | Target child   | 14  | 146.29 ± 163.33   | 848.61 ± 371.19   | 1751.36 ± 804.52  | 450.69 ± 182.68  |
| Dutch    | Father         | 4   | 260.50 ± 331.46   | 907.43 ± 403.43   | 2103.75 ± 478.71  | 601.04 ± 171.41  |
| Dutch    | Investigator   | 6   | 583.67 ± 340.95   | 1652.11 ± 338.62  | 3123.67 ± 800.49  | 639.47 ± 213.75  |
| Dutch    | Mother         | 7   | 463.00 ± 164.79   | 1913.59 ± 416.91  | 3502.86 ± 1205.47 | 618.22 ± 133.04  |
| Dutch    | Other children | 1   | 7.00 ± 0.00       | 50.32 ± 0.00      | 259.00 ± 0.00     | 55.73 ± 0.00     |
| English  | Target child   | 58  | 287.66 ± 323.98   | 955.33 ± 909.46   | 1924.84 ± 1907.47 | 416.48 ± 433.66  |
| English  | Father         | 13  | 43.15 ± 61.83     | 642.19 ± 848.31   | 1988.23 ± 1919.29 | 498.28 ± 442.88  |
| English  | Investigator   | 29  | 149.17 ± 407.44   | 452.81 ± 804.28   | 1012.93 ± 1317.90 | 263.40 ± 325.14  |
| English  | Mother         | 26  | 1291.08 ± 1124.29 | 2795.50 ± 1406.85 | 4674.77 ± 1876.07 | 752.15 ± 381.11  |
| English  | Other adults   | 31  | 24.48 ± 27.60     | 207.30 ± 252.74   | 677.19 ± 923.52   | 204.77 ± 295.83  |
| English  | Other children | 14  | 42.71 ± 34.54     | 195.00 ± 162.22   | 644.36 ± 936.52   | 217.71 ± 382.30  |
| English  | Remainder      | 7   | 10.86 ± 4.56      | 76.28 ± 48.52     | 396.14 ± 387.20   | 101.05 ± 89.89   |
| German   | Target child   | 24  | 386.21 ± 285.92   | 1413.75 ± 571.53  | 2858.00 ± 1055.20 | 773.15 ± 312.20  |
| German   | Father         | 4   | 7.75 ± 3.20       | 1004.30 ± 865.96  | 3154.25 ± 2319.96 | 926.94 ± 655.79  |
| German   | Investigator   | 10  | 27.50 ± 29.62     | 319.19 ± 197.76   | 1028.40 ± 931.02  | 293.28 ± 224.40  |
| German   | Mother         | 9   | 339.33 ± 499.85   | 1699.18 ± 707.17  | 4764.89 ± 3106.68 | 1039.05 ± 589.70 |
| German   | Other adults   | 8   | 91.00 ± 175.56    | 739.08 ± 786.29   | 1805.50 ± 1882.96 | 512.66 ± 463.17  |
| German   | Other children | 6   | 50.67 ± 48.07     | 332.70 ± 261.74   | 720.50 ± 608.78   | 217.36 ± 153.01  |
| German   | Remainder      | 1   | 24.00 ± 0.00      | 36.00 ± 0.00      | 48.00 ± 0.00      | 16.97 ± 0.00     |
| Swedish  | Target child   | 5   | 212.60 ± 74.05    | 1009.80 ± 193.26  | 1951.00 ± 354.65  | 458.78 ± 62.32   |
| Swedish  | Father         | 3   | 149.67 ± 230.65   | 1073.30 ± 335.43  | 2079.67 ± 367.70  | 693.76 ± 320.93  |
| Swedish  | Mother         | 5   | 211.20 ± 246.66   | 1509.49 ± 678.05  | 2605.40 ± 1006.20 | 607.18 ± 233.20  |
| Swedish  | Other adults   | 4   | 88.25 ± 121.55    | 878.39 ± 541.38   | 2041.00 ± 666.15  | 637.26 ± 183.78  |

$N$  is the number of individuals analyzed for a given role class and language category that have at least  $m^* = 5$  time points (see Methods for a justification of this lower bound). For each individual, four statistics concerning  $T$  are computed: the minimum ( $min$ ), the mean ( $mean$ ), the maximum ( $max$ ) and the standard deviation ( $dev$ ) over all his/her transcripts. The mean plus/minus 1 standard deviation of these four statistics is shown for each role class and language category (when  $N = 1$ , a standard deviation of 0 is assumed).

**Table 5. Analysis of the variation  $n$ , the number of different words.**

| Language | Role class     | $N$ | $n$             |                 |                 |                |
|----------|----------------|-----|-----------------|-----------------|-----------------|----------------|
|          |                |     | $min$           | $mean$          | $max$           | $dev$          |
| All      | Target child   | 101 | 70.41 ± 60.63   | 221.92 ± 112.05 | 390.77 ± 192.03 | 95.07 ± 51.54  |
| All      | Father         | 24  | 39.71 ± 63.01   | 200.76 ± 131.87 | 432.88 ± 222.87 | 114.29 ± 61.62 |
| All      | Investigator   | 45  | 60.42 ± 88.71   | 155.09 ± 126.62 | 287.53 ± 177.80 | 66.48 ± 40.89  |
| All      | Mother         | 47  | 202.04 ± 161.04 | 440.22 ± 155.20 | 699.15 ± 223.16 | 115.10 ± 57.85 |
| All      | Other adults   | 43  | 22.56 ± 35.84   | 111.62 ± 109.94 | 244.49 ± 218.16 | 70.69 ± 59.97  |
| All      | Other children | 21  | 25.71 ± 21.59   | 79.33 ± 56.79   | 169.19 ± 114.29 | 47.68 ± 37.02  |
| All      | Remainder      | 8   | 7.25 ± 4.56     | 28.01 ± 10.84   | 84.25 ± 87.72   | 21.80 ± 16.84  |
| Dutch    | Target child   | 14  | 50.57 ± 45.28   | 192.64 ± 71.01  | 335.93 ± 124.27 | 79.72 ± 25.20  |
| Dutch    | Father         | 4   | 110.75 ± 116.32 | 263.96 ± 95.38  | 466.25 ± 88.99  | 119.50 ± 42.78 |
| Dutch    | Investigator   | 6   | 197.67 ± 81.32  | 362.33 ± 43.99  | 532.50 ± 23.40  | 85.86 ± 28.82  |
| Dutch    | Mother         | 7   | 176.29 ± 50.58  | 425.71 ± 48.36  | 629.71 ± 86.27  | 92.79 ± 14.04  |
| Dutch    | Other children | 1   | 2.00 ± 0.00     | 11.32 ± 0.00    | 88.00 ± 0.00    | 18.08 ± 0.00   |
| English  | Target child   | 58  | 68.28 ± 66.85   | 188.24 ± 111.44 | 332.90 ± 192.47 | 73.98 ± 39.40  |
| English  | Father         | 13  | 26.00 ± 35.49   | 165.44 ± 141.12 | 380.77 ± 224.92 | 94.57 ± 51.17  |
| English  | Investigator   | 29  | 45.97 ± 78.77   | 123.24 ± 115.58 | 240.10 ± 161.76 | 57.02 ± 39.21  |
| English  | Mother         | 26  | 264.00 ± 171.24 | 478.12 ± 173.83 | 715.46 ± 186.99 | 100.82 ± 41.14 |
| English  | Other adults   | 31  | 15.58 ± 15.80   | 76.96 ± 60.43   | 188.26 ± 156.76 | 55.08 ± 49.57  |
| English  | Other children | 14  | 26.71 ± 22.05   | 71.14 ± 33.93   | 161.14 ± 98.26  | 46.23 ± 37.69  |
| English  | Remainder      | 7   | 5.86 ± 2.48     | 28.80 ± 11.45   | 92.29 ± 91.51   | 23.80 ± 17.12  |
| German   | Target child   | 24  | 86.42 ± 54.72   | 312.26 ± 91.49  | 553.17 ± 144.81 | 154.57 ± 48.44 |
| German   | Father         | 4   | 6.50 ± 3.51     | 231.01 ± 170.37 | 604.75 ± 329.13 | 171.10 ± 93.75 |
| German   | Investigator   | 10  | 20.00 ± 21.18   | 123.13 ± 52.06  | 278.10 ± 159.66 | 82.27 ± 45.98  |
| German   | Mother         | 9   | 105.33 ± 143.15 | 407.11 ± 142.50 | 828.00 ± 326.95 | 182.07 ± 83.50 |
| German   | Other adults   | 8   | 41.75 ± 70.67   | 201.77 ± 179.48 | 392.25 ± 350.27 | 110.02 ± 83.08 |
| German   | Other children | 6   | 27.33 ± 21.96   | 109.77 ± 87.65  | 201.50 ± 156.18 | 56.03 ± 39.02  |
| German   | Remainder      | 1   | 17.00 ± 0.00    | 22.50 ± 0.00    | 28.00 ± 0.00    | 7.78 ± 0.00    |
| Swedish  | Target child   | 5   | 73.80 ± 36.69   | 260.93 ± 45.38  | 436.20 ± 57.12  | 97.15 ± 14.20  |
| Swedish  | Father         | 3   | 48.67 ± 64.38   | 229.18 ± 64.62  | 385.00 ± 104.52 | 117.07 ± 54.51 |
| Swedish  | Mother         | 5   | 90.00 ± 85.40   | 323.07 ± 121.22 | 479.60 ± 146.42 | 100.08 ± 33.11 |
| Swedish  | Other adults   | 4   | 38.25 ± 44.99   | 199.86 ± 114.24 | 384.75 ± 130.96 | 113.01 ± 25.28 |

The same format as in Table 4 is adopted. In our analyses,  $n$  is equivalent  $r_M$ , one of the parameters of the right-truncated zeta distribution.

### 3. Normalizations excluded from the main article

#### 3.1. Normalization by prefix: additional tables with lower cut-offs

3.1.1. *Dependencies of parameters with age* Figures 1 and 2 show the evolution of  $\alpha$  with time for cut-offs at  $T^* = 250$  and  $n^* = 50$ , respectively.



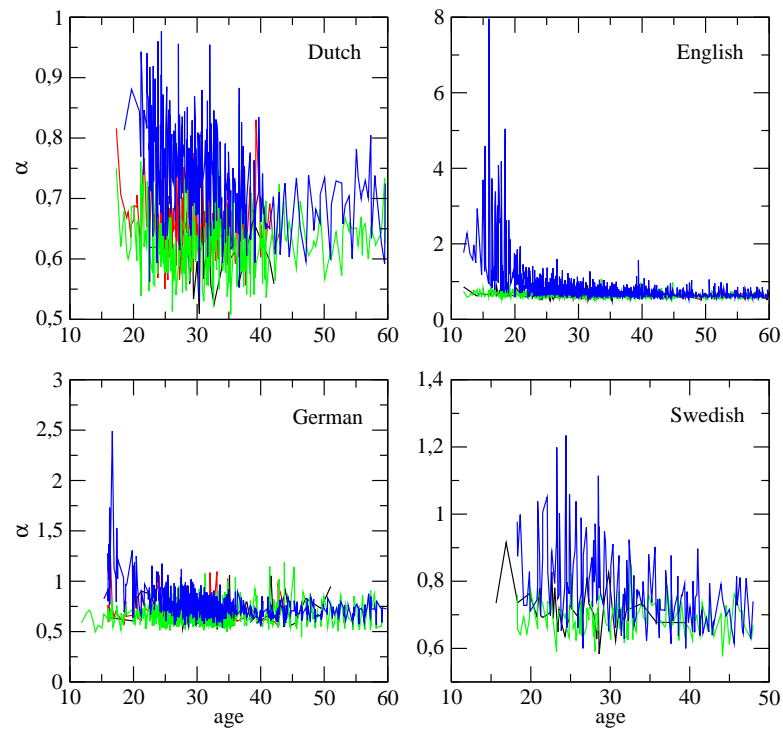

**Figure 1. The evolution of the exponent  $\alpha$  versus child age (in months):**  $T^* = 250$ . The major classes of roles, i.e. target children (blue), mothers (green), investigators (red) and fathers (black), are shown. Length normalization by prefix with  $T^* = 250$  is used. Swedish lacks the class 'investigator'.

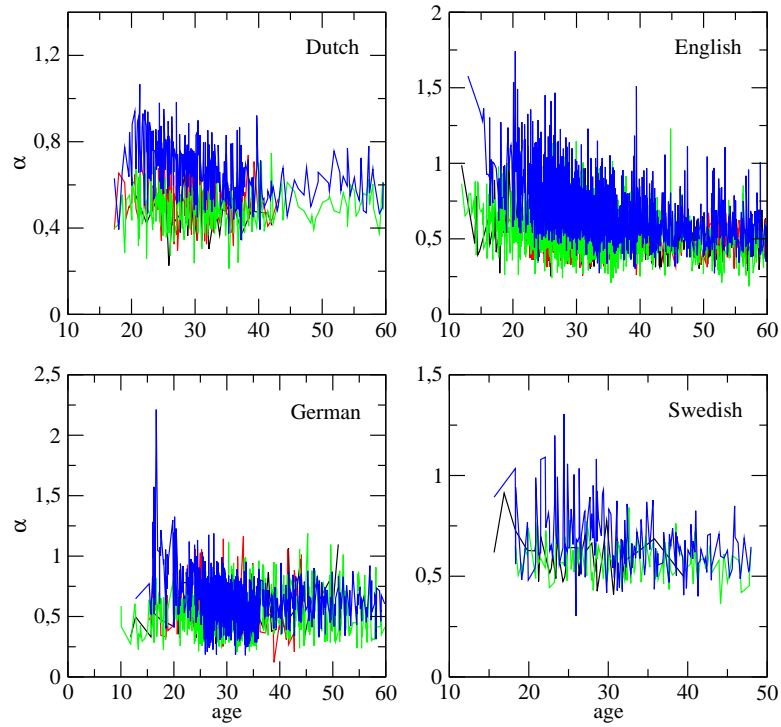

**Figure 2.** The evolution of the exponent  $\alpha$  versus child age (in months):  $n^* = 50$ . The major classes of roles, i.e. target children (blue), mothers (green), investigators (red) and fathers (black), are shown. Length normalization by prefix with  $n^* = 50$  is used. Swedish lacks the class 'investigator'.

Tables 6 and 7 show the results of the analysis of the dependency between  $\alpha$  and age for cut-offs at  $T^* = 250$  and  $n^* = 50$ , respectively.

**Table 6. The dependency between  $\alpha$  and age: length normalization by prefix with  $T^* = 250$** 

| Language | Role class     | Sign of the dependency |       |       | Significance of the correlation |         |         |       |
|----------|----------------|------------------------|-------|-------|---------------------------------|---------|---------|-------|
|          |                | $N$                    | $N_+$ | $N_-$ | $N$                             | $N_+^S$ | $N_-^S$ | $N_?$ |
| All      | Target child   | 90                     | 15 ↓  | 75 ↑  | 90                              | 0       | 44 ↑    | 46 ↓  |
| All      | Father         | 20                     | 3 ↓   | 17 ↑  | 20                              | 0       | 1       | 19    |
| All      | Investigator   | 24                     | 5 ↓   | 19 ↑  | 24                              | 0       | 2       | 22    |
| All      | Mother         | 47                     | 13 ↓  | 34 ↑  | 47                              | 1       | 14 ↑    | 32 ↓  |
| All      | Other adults   | 13                     | 5     | 8     | 13                              | 0       | 1       | 12    |
| All      | Other children | 5                      | 1     | 4     | 5                               | 0       | 0       | 5     |
| All      | Remainder      | 1                      | 0     | 1     | 1                               | 0       | 0       | 1     |
| Dutch    | Target child   | 14                     | 4     | 10    | 14                              | 0       | 9 ↑     | 5 ↓   |
| Dutch    | Father         | 4                      | 0     | 4     | 4                               | 0       | 0       | 4     |
| Dutch    | Investigator   | 6                      | 1     | 5     | 6                               | 0       | 0       | 6     |
| Dutch    | Mother         | 7                      | 2     | 5     | 7                               | 0       | 1       | 6     |
| English  | Target child   | 47                     | 10 ↓  | 37 ↑  | 47                              | 0       | 22 ↑    | 25 ↓  |
| English  | Father         | 10                     | 2     | 8     | 10                              | 0       | 0       | 10    |
| English  | Investigator   | 15                     | 3 ↓   | 12 ↑  | 15                              | 0       | 2       | 13    |
| English  | Mother         | 26                     | 8 ↓   | 18 ↑  | 26                              | 0       | 9 ↑     | 17 ↓  |
| English  | Other adults   | 6                      | 2     | 4     | 6                               | 0       | 0       | 6     |
| English  | Other children | 3                      | 0     | 3     | 3                               | 0       | 0       | 3     |
| English  | Remainder      | 1                      | 0     | 1     | 1                               | 0       | 0       | 1     |
| German   | Target child   | 24                     | 1 ↓   | 23 ↑  | 24                              | 0       | 9 ↑     | 15 ↓  |
| German   | Father         | 3                      | 1     | 2     | 3                               | 0       | 0       | 3     |
| German   | Investigator   | 3                      | 1     | 2     | 3                               | 0       | 0       | 3     |
| German   | Mother         | 9                      | 2     | 7     | 9                               | 0       | 3 ↑     | 6 ↓   |
| German   | Other adults   | 4                      | 1     | 3     | 4                               | 0       | 1       | 3     |
| German   | Other children | 2                      | 1     | 1     | 2                               | 0       | 0       | 2     |
| Swedish  | Target child   | 5                      | 0 ↓   | 5 ↑   | 5                               | 0       | 4 ↑     | 1 ↓   |
| Swedish  | Father         | 3                      | 0     | 3     | 3                               | 0       | 1       | 2     |
| Swedish  | Mother         | 5                      | 1     | 4     | 5                               | 1       | 1       | 3 ↓   |
| Swedish  | Other adults   | 3                      | 2     | 1     | 3                               | 0       | 0       | 3     |

Analysis of the correlation between  $\alpha$  and age from two perspectives: the sign of the correlation and the significance of the correlations. Four language categories, i.e. All (all languages mixed), Dutch, English, German and Swedish, are considered.  $N$  is the number of individuals analyzed for a given role class and language category that had at least  $m^* = 5$  different points of time (the minimum number of points needed to show a significant correlation between a parameter and age through a two-sided correlation test at a significance level of 0.05, see the Methods section). This filter was applied for consistency between the analysis of the sign of the dependency and its significance. For each individual, the Spearman rank correlation [1] between age and a certain parameter of the right-truncated distribution was computed. In the analysis of the sign of the correlation, two counts are provided, namely  $N_+$  and  $N_-$ , for each role class and language category.  $N_+$  and  $N_-$  are, respectively, the number individuals with a positive and negative correlation (regardless of the sign of the correlation). In the analysis of the significance of the correlation, three counts are provided, namely  $N_+^S$ ,  $N_-^S$  and  $N_?$ , for each role class and language category.  $N_+^S$  and  $N_-^S$  are the number individuals with a statistically significant positive and negative correlation, respectively.  $N_?$  is the number of individuals with a correlation that is not significant. Significance was decided by a two-sided Spearman rank correlation test [1] at a significance level  $\alpha = 0.05$ .  $\uparrow$  and  $\downarrow$  indicate counts that are, respectively, significantly high or significantly low according to a binomial test (see Methods).

**Table 7. The dependency between  $\alpha$  and age: length normalization by prefix with  $n^* = 50$** 

| Language | Role class     | Sign of the dependency |       |       | Significance of the correlation |         |         |       |
|----------|----------------|------------------------|-------|-------|---------------------------------|---------|---------|-------|
|          |                | $N$                    | $N_+$ | $N_-$ | $N$                             | $N_+^S$ | $N_-^S$ | $N_?$ |
| All      | Target child   | 99                     | 11 ↓  | 88 ↑  | 99                              | 0       | 47 ↑    | 52 ↓  |
| All      | Father         | 23                     | 10    | 13    | 23                              | 0       | 2       | 21    |
| All      | Investigator   | 39                     | 15    | 24    | 39                              | 0       | 2       | 37    |
| All      | Mother         | 47                     | 12 ↓  | 35 ↑  | 47                              | 0       | 8 ↑     | 39 ↓  |
| All      | Other adults   | 25                     | 10    | 15    | 25                              | 0       | 2       | 23    |
| All      | Other children | 11                     | 3     | 8     | 11                              | 0       | 2 ↑     | 9     |
| All      | Remainder      | 1                      | 0     | 1     | 1                               | 0       | 0       | 1     |
| Dutch    | Target child   | 14                     | 1 ↓   | 13 ↑  | 14                              | 0       | 8 ↑     | 6 ↓   |
| Dutch    | Father         | 4                      | 2     | 2     | 4                               | 0       | 0       | 4     |
| Dutch    | Investigator   | 6                      | 1     | 5     | 6                               | 0       | 0       | 6     |
| Dutch    | Mother         | 7                      | 3     | 4     | 7                               | 0       | 0       | 7     |
| English  | Target child   | 56                     | 6 ↓   | 50 ↑  | 56                              | 0       | 26 ↑    | 30 ↓  |
| English  | Father         | 12                     | 3     | 9     | 12                              | 0       | 2 ↑     | 10    |
| English  | Investigator   | 24                     | 7 ↓   | 17 ↑  | 24                              | 0       | 1       | 23    |
| English  | Mother         | 26                     | 6 ↓   | 20 ↑  | 26                              | 0       | 5 ↑     | 21 ↓  |
| English  | Other adults   | 18                     | 8     | 10    | 18                              | 0       | 1       | 17    |
| English  | Other children | 9                      | 2     | 7     | 9                               | 0       | 2 ↑     | 7     |
| English  | Remainder      | 1                      | 0     | 1     | 1                               | 0       | 0       | 1     |
| German   | Target child   | 24                     | 4 ↓   | 20 ↑  | 24                              | 0       | 10 ↑    | 14 ↓  |
| German   | Father         | 4                      | 4     | 0     | 4                               | 0       | 0       | 4     |
| German   | Investigator   | 9                      | 7     | 2     | 9                               | 0       | 1       | 8     |
| German   | Mother         | 9                      | 2     | 7     | 9                               | 0       | 2 ↑     | 7     |
| German   | Other adults   | 4                      | 1     | 3     | 4                               | 0       | 1       | 3     |
| German   | Other children | 2                      | 1     | 1     | 2                               | 0       | 0       | 2     |
| Swedish  | Target child   | 5                      | 0 ↓   | 5 ↑   | 5                               | 0       | 3 ↑     | 2 ↓   |
| Swedish  | Father         | 3                      | 1     | 2     | 3                               | 0       | 0       | 3     |
| Swedish  | Mother         | 5                      | 1     | 4     | 5                               | 0       | 1       | 4     |
| Swedish  | Other adults   | 3                      | 1     | 2     | 3                               | 0       | 0       | 3     |

Methods (other than the normalization) and format are the same as in Table 6.

Figure 3 shows evolution of the dependency between  $r_M$  and age for a cut-off at  $T^* = 250$ .

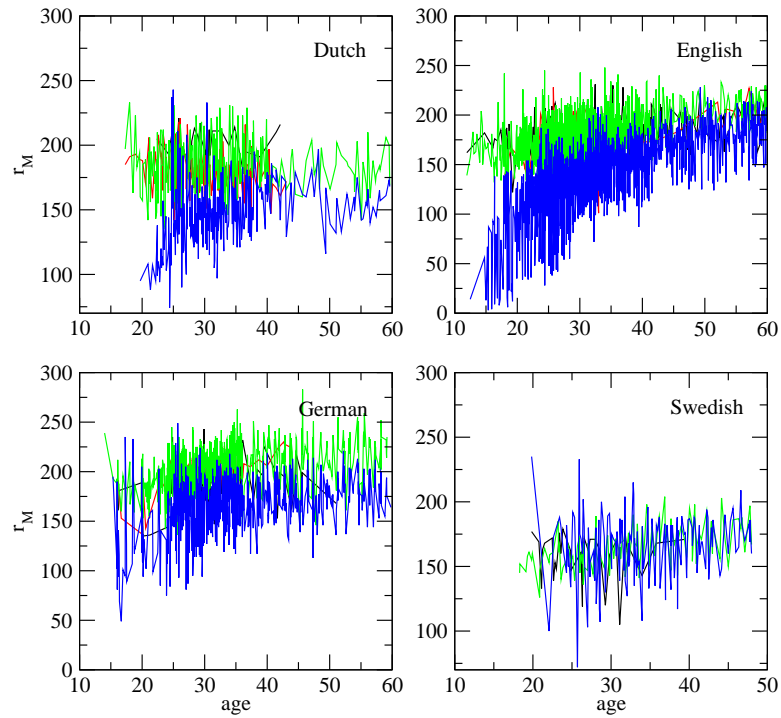

**Figure 3.** The evolution of the maximum rank  $r_M$  versus child age (in months):  $T^* = 250$ . The major classes of roles, i.e. target children (blue), mothers (green), investigators (red) and fathers (black), are shown. Length normalization by prefix with  $T^* = 250$  is used. Swedish lacks the class 'investigator'.

Table 8 shows the results of the analysis of the dependency between  $r_M$  and age for this normalization.

**Table 8. The dependency between  $r_M$  and age: length normalization by prefix with  $T^* = 250$**

| Language | Role class     | Sign of the dependency |       |       | Significance of the correlation |         |         |       |
|----------|----------------|------------------------|-------|-------|---------------------------------|---------|---------|-------|
|          |                | $N$                    | $N_+$ | $N_-$ | $N$                             | $N_+^S$ | $N_-^S$ | $N_?$ |
| All      | Target child   | 90                     | 82 ↑  | 8 ↓   | 90                              | 45 ↑    | 1       | 44 ↓  |
| All      | Father         | 20                     | 16 ↑  | 4 ↓   | 20                              | 4 ↑     | 0       | 16 ↓  |
| All      | Investigator   | 24                     | 16    | 8     | 24                              | 3 ↑     | 1       | 20 ↓  |
| All      | Mother         | 47                     | 42 ↑  | 5 ↓   | 47                              | 20 ↑    | 1       | 26 ↓  |
| All      | Other adults   | 13                     | 13 ↑  | 0 ↓   | 13                              | 5 ↑     | 0       | 8 ↓   |
| All      | Other children | 5                      | 5 ↑   | 0 ↓   | 5                               | 0       | 0       | 5     |
| All      | Remainder      | 1                      | 1     | 0     | 1                               | 0       | 0       | 1     |
| Dutch    | Target child   | 14                     | 13 ↑  | 1 ↓   | 14                              | 7 ↑     | 1       | 6 ↓   |
| Dutch    | Father         | 4                      | 4     | 0     | 4                               | 0       | 0       | 4     |
| Dutch    | Investigator   | 6                      | 1     | 5     | 6                               | 0       | 1       | 5     |
| Dutch    | Mother         | 7                      | 4     | 3     | 7                               | 1       | 1       | 5 ↓   |
| English  | Target child   | 47                     | 45 ↑  | 2 ↓   | 47                              | 24 ↑    | 0       | 23 ↓  |
| English  | Father         | 10                     | 8     | 2     | 10                              | 3 ↑     | 0       | 7 ↓   |
| English  | Investigator   | 15                     | 12 ↑  | 3 ↓   | 15                              | 1       | 0       | 14    |
| English  | Mother         | 26                     | 25 ↑  | 1 ↓   | 26                              | 13 ↑    | 0       | 13 ↓  |
| English  | Other adults   | 6                      | 6 ↑   | 0 ↓   | 6                               | 1       | 0       | 5     |
| English  | Other children | 3                      | 3     | 0     | 3                               | 0       | 0       | 3     |
| English  | Remainder      | 1                      | 1     | 0     | 1                               | 0       | 0       | 1     |
| German   | Target child   | 24                     | 20 ↑  | 4 ↓   | 24                              | 11 ↑    | 0       | 13 ↓  |
| German   | Father         | 3                      | 3     | 0     | 3                               | 0       | 0       | 3     |
| German   | Investigator   | 3                      | 3     | 0     | 3                               | 2 ↑     | 0       | 1 ↓   |
| German   | Mother         | 9                      | 8 ↑   | 1 ↓   | 9                               | 3 ↑     | 0       | 6 ↓   |
| German   | Other adults   | 4                      | 4     | 0     | 4                               | 2 ↑     | 0       | 2 ↓   |
| German   | Other children | 2                      | 2     | 0     | 2                               | 0       | 0       | 2     |
| Swedish  | Target child   | 5                      | 4     | 1     | 5                               | 3 ↑     | 0       | 2 ↓   |
| Swedish  | Father         | 3                      | 1     | 2     | 3                               | 1       | 0       | 2     |
| Swedish  | Mother         | 5                      | 5 ↑   | 0 ↓   | 5                               | 3 ↑     | 0       | 2 ↓   |
| Swedish  | Other adults   | 3                      | 3     | 0     | 3                               | 2 ↑     | 0       | 1 ↓   |

Methods (other than the target parameter) and format are the same as in Table 6.

*3.1.2. Dependencies between  $\alpha$  and MLU* Figures 4 and 5 show the actual dependency between  $\alpha$  and MLU for cut-offs at  $T^* = 250$  and  $n^* = 50$ , respectively.

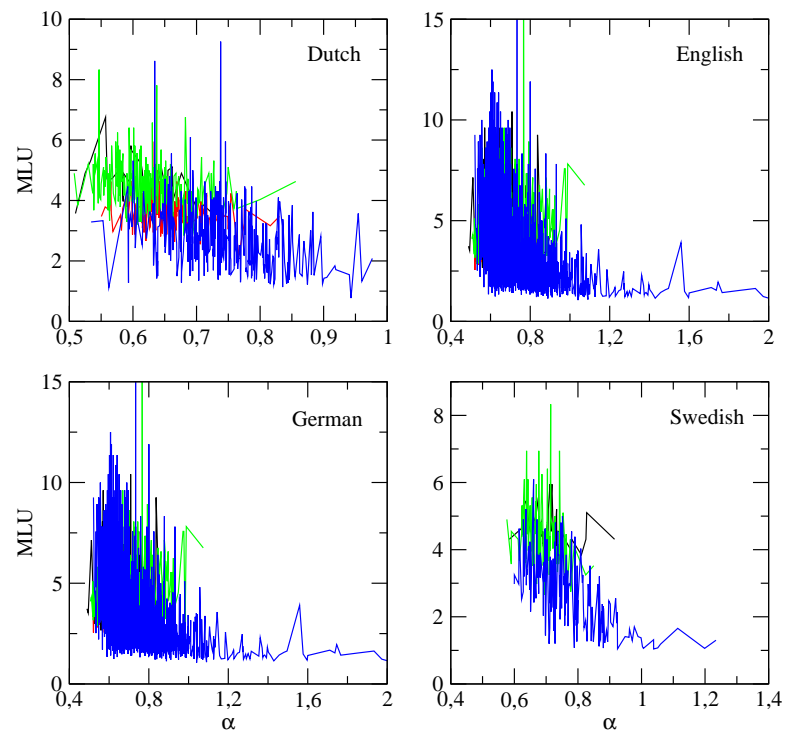

**Figure 4.** The MLU (in words) versus  $\alpha$ :  $T^* = 250$ . The major classes of roles, i.e. target children (blue), mothers (green), investigators (red) and fathers (black), are shown. Length normalization by prefix with  $T^* = 250$  is used. Swedish lacks the class 'investigator'. In order to facilitate the visual inspection of the series, the few points with MLU above 15 or  $\alpha$  above 2 are not shown (this concerns English and German).



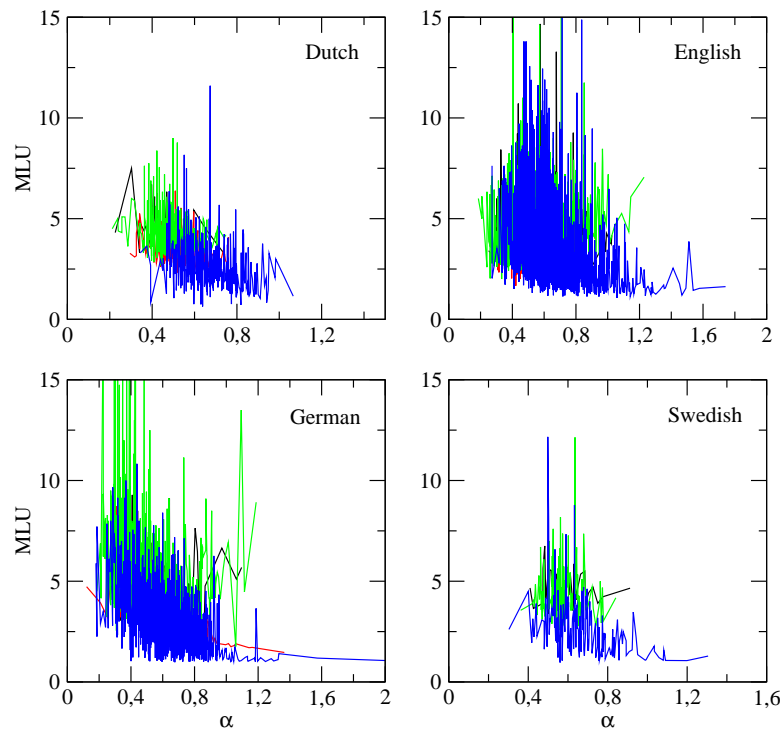

**Figure 5.** The MLU (in words) versus exponent  $\alpha$ :  $n^* = 50$ . The major classes of roles, i.e. target children (blue), mothers (green), investigators (red) and fathers (black), are shown. Length normalization by prefix with  $n^* = 50$  is used. Swedish lacks the class 'investigator'. In order to facilitate the visual inspection of the series, the few points with MLU above 15 or  $\alpha$  above 2 are not shown (this concerns English and German).

Tables 9 and 10 show the results of the analysis of the dependency between MLU and age for cut-offs at  $T^* = 250$  and  $n^* = 50$ , respectively.

**Table 9. The dependency between  $\alpha$  and MLU: length normalization by prefix with  $T^* = 250$**

| Language | Role class     | Sign of the dependency |       |       | Significance of the correlation |         |         |       |
|----------|----------------|------------------------|-------|-------|---------------------------------|---------|---------|-------|
|          |                | $N$                    | $N_+$ | $N_-$ | $N$                             | $N_+^S$ | $N_-^S$ | $N_?$ |
| All      | Target child   | 90                     | 14 ↓  | 76 ↑  | 90                              | 2       | 40 ↑    | 48 ↓  |
| All      | Father         | 20                     | 6     | 14    | 20                              | 0       | 5 ↑     | 15 ↓  |
| All      | Investigator   | 24                     | 8     | 16    | 24                              | 0       | 7 ↑     | 17 ↓  |
| All      | Mother         | 47                     | 21    | 26    | 47                              | 5 ↑     | 9 ↑     | 33 ↓  |
| All      | Other adults   | 13                     | 2 ↓   | 11 ↑  | 13                              | 0       | 2 ↑     | 11    |
| All      | Other children | 5                      | 1     | 4     | 5                               | 0       | 2 ↑     | 3 ↓   |
| All      | Remainder      | 1                      | 0     | 1     | 1                               | 0       | 0       | 1     |
| Dutch    | Target child   | 14                     | 4     | 10    | 14                              | 0       | 8 ↑     | 6 ↓   |
| Dutch    | Father         | 4                      | 2     | 2     | 4                               | 0       | 1       | 3     |
| Dutch    | Investigator   | 6                      | 1     | 5     | 6                               | 0       | 2 ↑     | 4 ↓   |
| Dutch    | Mother         | 7                      | 2     | 5     | 7                               | 0       | 1       | 6     |
| English  | Target child   | 47                     | 8 ↓   | 39 ↑  | 47                              | 2       | 21 ↑    | 24 ↓  |
| English  | Father         | 10                     | 3     | 7     | 10                              | 0       | 3 ↑     | 7 ↓   |
| English  | Investigator   | 15                     | 7     | 8     | 15                              | 0       | 2       | 13    |
| English  | Mother         | 26                     | 15    | 11    | 26                              | 4 ↑     | 2       | 20 ↓  |
| English  | Other adults   | 6                      | 1     | 5     | 6                               | 0       | 1       | 5     |
| English  | Other children | 3                      | 0     | 3     | 3                               | 0       | 2 ↑     | 1 ↓   |
| English  | Remainder      | 1                      | 0     | 1     | 1                               | 0       | 0       | 1     |
| German   | Target child   | 24                     | 2 ↓   | 22 ↑  | 24                              | 0       | 7 ↑     | 17 ↓  |
| German   | Father         | 3                      | 1     | 2     | 3                               | 0       | 1       | 2     |
| German   | Investigator   | 3                      | 0     | 3     | 3                               | 0       | 3 ↑     | 0 ↓   |
| German   | Mother         | 9                      | 2     | 7     | 9                               | 1       | 5 ↑     | 3 ↓   |
| German   | Other adults   | 4                      | 1     | 3     | 4                               | 0       | 0       | 4     |
| German   | Other children | 2                      | 1     | 1     | 2                               | 0       | 0       | 2     |
| Swedish  | Target child   | 5                      | 0 ↓   | 5 ↑   | 5                               | 0       | 4 ↑     | 1 ↓   |
| Swedish  | Father         | 3                      | 0     | 3     | 3                               | 0       | 0       | 3     |
| Swedish  | Mother         | 5                      | 2     | 3     | 5                               | 0       | 1       | 4     |
| Swedish  | Other adults   | 3                      | 0     | 3     | 3                               | 0       | 1       | 2     |

Methods (other than the target variables) and format are the same as in Table 6.

**Table 10. The dependency between  $\alpha$  and MLU: length normalization by prefix with  $n^* = 50$** 

| Language | Role class     | Sign of the dependency |       |       | Significance of the correlation |         |         |       |
|----------|----------------|------------------------|-------|-------|---------------------------------|---------|---------|-------|
|          |                | $N$                    | $N_+$ | $N_-$ | $N$                             | $N_+^S$ | $N_-^S$ | $N_?$ |
| All      | Target child   | 99                     | 12 ↓  | 87 ↑  | 99                              | 1       | 38 ↑    | 60 ↓  |
| All      | Father         | 23                     | 11    | 12    | 23                              | 0       | 3 ↑     | 20    |
| All      | Investigator   | 39                     | 15    | 24    | 39                              | 0       | 6 ↑     | 33 ↓  |
| All      | Mother         | 47                     | 23    | 24    | 47                              | 4 ↑     | 6 ↑     | 37 ↓  |
| All      | Other adults   | 25                     | 5 ↓   | 20 ↑  | 25                              | 0       | 1       | 24    |
| All      | Other children | 11                     | 3     | 8     | 11                              | 0       | 1       | 10    |
| All      | Remainder      | 1                      | 0     | 1     | 1                               | 0       | 1 ↑     | 0 ↓   |
| Dutch    | Target child   | 14                     | 0 ↓   | 14 ↑  | 14                              | 0       | 6 ↑     | 8 ↓   |
| Dutch    | Father         | 4                      | 2     | 2     | 4                               | 0       | 0       | 4     |
| Dutch    | Investigator   | 6                      | 2     | 4     | 6                               | 0       | 2 ↑     | 4 ↓   |
| Dutch    | Mother         | 7                      | 1     | 6     | 7                               | 0       | 0       | 7     |
| English  | Target child   | 56                     | 8 ↓   | 48 ↑  | 56                              | 0       | 20 ↑    | 36 ↓  |
| English  | Father         | 12                     | 7     | 5     | 12                              | 0       | 2 ↑     | 10    |
| English  | Investigator   | 24                     | 12    | 12    | 24                              | 0       | 0       | 24    |
| English  | Mother         | 26                     | 16    | 10    | 26                              | 3 ↑     | 2       | 21 ↓  |
| English  | Other adults   | 18                     | 5 ↓   | 13 ↑  | 18                              | 0       | 1       | 17    |
| English  | Other children | 9                      | 1 ↓   | 8 ↑   | 9                               | 0       | 1       | 8     |
| English  | Remainder      | 1                      | 0     | 1     | 1                               | 0       | 1 ↑     | 0     |
| German   | Target child   | 24                     | 4 ↓   | 20 ↑  | 24                              | 1       | 9 ↑     | 14 ↓  |
| German   | Father         | 4                      | 1     | 3     | 4                               | 0       | 1       | 3     |
| German   | Investigator   | 9                      | 1 ↓   | 8 ↑   | 9                               | 0       | 4 ↑     | 5 ↓   |
| German   | Mother         | 9                      | 3     | 6     | 9                               | 1       | 4 ↑     | 4 ↓   |
| German   | Other adults   | 4                      | 0     | 4     | 4                               | 0       | 0       | 4     |
| German   | Other children | 2                      | 2     | 0     | 2                               | 0       | 0       | 2     |
| Swedish  | Target child   | 5                      | 0 ↓   | 5 ↑   | 5                               | 0       | 3 ↑     | 2 ↓   |
| Swedish  | Father         | 3                      | 1     | 2     | 3                               | 0       | 0       | 3     |
| Swedish  | Mother         | 5                      | 3     | 2     | 5                               | 0       | 0       | 5     |
| Swedish  | Other adults   | 3                      | 0     | 3     | 3                               | 0       | 0       | 3     |

Methods (other than the normalization and the target variables) and format are the same as in Table 6.

### 3.2. Normalization by random sampling.

3.2.1. *Dependency of parameters with age* The analysis of the correlation between  $\alpha$  and time supports the idea that the behavior of infants and adults differs notably. The analysis of the sign of the correlation between  $\alpha$  and age confirms the tendency of  $\alpha$  to decrease over time:  $N_+$  is never significantly high while  $N_-$  is significantly

large in the majority of target children with the only exception of Swedish, where the number of target children is very small, and also significantly large in investigators and parents depending on the language (Tables 11 and 12 for length normalization; Tables 13 and 14 for observed vocabulary size normalization). If the significance of the correlation between  $\alpha$  and age is taken into account, then it turns out that  $N_+^S$  is very small (zero in the majority of cases), and never significantly large (Tables 11 and 12 for length normalization; Tables 13 and 14 for observed vocabulary size normalization). Interestingly,  $N_-^S$  is significantly large for all target children (no exception), and the ratio  $N_-^S/N$  (where  $N = N_+^S + N_-^S + N_?$ ) in target children is in stark contrast with the that of other classes of roles where  $N_-^S$  is significantly large. These results confirm the previous results with normalization by prefix. Furthermore, they suggest that (a) prefix normalization does not omit important information by taking only the beginning of the transcript and (b) the qualitative results do not depend on whether the words selected are consecutive or not.

**Table 11. The dependency between  $\alpha$  and age: length normalization by random sampling with  $T^* = 250$** 

| Language | Role class     | Sign of the dependency |       |       | Significance of the correlation |         |         |       |
|----------|----------------|------------------------|-------|-------|---------------------------------|---------|---------|-------|
|          |                | $N$                    | $N_+$ | $N_-$ | $N$                             | $N_+^S$ | $N_-^S$ | $N_?$ |
| All      | Target child   | 90                     | 11 ↓  | 79 ↑  | 90                              | 1       | 49 ↑    | 40 ↓  |
| All      | Father         | 20                     | 6     | 14    | 20                              | 0       | 2       | 18    |
| All      | Investigator   | 24                     | 7 ↓   | 17 ↑  | 24                              | 0       | 5 ↑     | 19 ↓  |
| All      | Mother         | 47                     | 13 ↓  | 34 ↑  | 47                              | 1       | 12 ↑    | 34 ↓  |
| All      | Other adults   | 13                     | 2 ↓   | 11 ↑  | 13                              | 0       | 1       | 12    |
| All      | Other children | 5                      | 1     | 4     | 5                               | 0       | 1       | 4     |
| All      | Remainder      | 1                      | 0     | 1     | 1                               | 0       | 0       | 1     |
| Dutch    | Target child   | 14                     | 2 ↓   | 12 ↑  | 14                              | 0       | 8 ↑     | 6 ↓   |
| Dutch    | Father         | 4                      | 1     | 3     | 4                               | 0       | 0       | 4     |
| Dutch    | Investigator   | 6                      | 2     | 4     | 6                               | 0       | 2 ↑     | 4 ↓   |
| Dutch    | Mother         | 7                      | 1     | 6     | 7                               | 0       | 1       | 6     |
| English  | Target child   | 47                     | 8 ↓   | 39 ↑  | 47                              | 1       | 27 ↑    | 19 ↓  |
| English  | Father         | 10                     | 3     | 7     | 10                              | 0       | 1       | 9     |
| English  | Investigator   | 15                     | 4     | 11    | 15                              | 0       | 2       | 13    |
| English  | Mother         | 26                     | 5 ↓   | 21 ↑  | 26                              | 1       | 8 ↑     | 17 ↓  |
| English  | Other adults   | 6                      | 1     | 5     | 6                               | 0       | 0       | 6     |
| English  | Other children | 3                      | 1     | 2     | 3                               | 0       | 1       | 2     |
| English  | Remainder      | 1                      | 0     | 1     | 1                               | 0       | 0       | 1     |
| German   | Target child   | 24                     | 0 ↓   | 24 ↑  | 24                              | 0       | 10 ↑    | 14 ↓  |
| German   | Father         | 3                      | 1     | 2     | 3                               | 0       | 0       | 3     |
| German   | Investigator   | 3                      | 1     | 2     | 3                               | 0       | 1       | 2     |
| German   | Mother         | 9                      | 4     | 5     | 9                               | 0       | 2 ↑     | 7     |
| German   | Other adults   | 4                      | 1     | 3     | 4                               | 0       | 1       | 3     |
| German   | Other children | 2                      | 0     | 2     | 2                               | 0       | 0       | 2     |
| Swedish  | Target child   | 5                      | 1     | 4     | 5                               | 0       | 4 ↑     | 1 ↓   |
| Swedish  | Father         | 3                      | 1     | 2     | 3                               | 0       | 1       | 2     |
| Swedish  | Mother         | 5                      | 3     | 2     | 5                               | 0       | 1       | 4     |
| Swedish  | Other adults   | 3                      | 0     | 3     | 3                               | 0       | 0       | 3     |

Methods (other than the normalization) and format are the same as in Table 6.

**Table 12. The dependency between  $\alpha$  and age: length normalization by random sampling with  $T^* = 500$** 

| Language | Role class     | Sign of the dependency |       |       | Significance of the correlation |         |         |       |
|----------|----------------|------------------------|-------|-------|---------------------------------|---------|---------|-------|
|          |                | $N$                    | $N_+$ | $N_-$ | $N$                             | $N_+^S$ | $N_-^S$ | $N_?$ |
| All      | Target child   | 71                     | 7 ↓   | 64 ↑  | 71                              | 2       | 43 ↑    | 26 ↓  |
| All      | Father         | 14                     | 4     | 10    | 14                              | 0       | 2 ↑     | 12    |
| All      | Investigator   | 17                     | 3 ↓   | 14 ↑  | 17                              | 0       | 3 ↑     | 14    |
| All      | Mother         | 47                     | 14 ↓  | 33 ↑  | 47                              | 0       | 10 ↑    | 37 ↓  |
| All      | Other adults   | 8                      | 4     | 4     | 8                               | 0       | 2 ↑     | 6     |
| All      | Other children | 2                      | 1     | 1     | 2                               | 0       | 0       | 2     |
| Dutch    | Target child   | 12                     | 2 ↓   | 10 ↑  | 12                              | 0       | 6 ↑     | 6 ↓   |
| Dutch    | Father         | 2                      | 1     | 1     | 2                               | 0       | 1 ↑     | 1     |
| Dutch    | Investigator   | 6                      | 1     | 5     | 6                               | 0       | 0       | 6     |
| Dutch    | Mother         | 7                      | 3     | 4     | 7                               | 0       | 1       | 6     |
| English  | Target child   | 34                     | 4 ↓   | 30 ↑  | 34                              | 2       | 22 ↑    | 10 ↓  |
| English  | Father         | 7                      | 1     | 6     | 7                               | 0       | 1       | 6     |
| English  | Investigator   | 8                      | 2     | 6     | 8                               | 0       | 2 ↑     | 6     |
| English  | Mother         | 26                     | 4 ↓   | 22 ↑  | 26                              | 0       | 7 ↑     | 19 ↓  |
| English  | Other adults   | 2                      | 1     | 1     | 2                               | 0       | 0       | 2     |
| German   | Target child   | 20                     | 0 ↓   | 20 ↑  | 20                              | 0       | 11 ↑    | 9 ↓   |
| German   | Father         | 3                      | 2     | 1     | 3                               | 0       | 0       | 3     |
| German   | Investigator   | 3                      | 0     | 3     | 3                               | 0       | 1       | 2     |
| German   | Mother         | 9                      | 4     | 5     | 9                               | 0       | 1       | 8     |
| German   | Other adults   | 3                      | 2     | 1     | 3                               | 0       | 1       | 2     |
| German   | Other children | 2                      | 1     | 1     | 2                               | 0       | 0       | 2     |
| Swedish  | Target child   | 5                      | 1     | 4     | 5                               | 0       | 4 ↑     | 1 ↓   |
| Swedish  | Father         | 2                      | 0     | 2     | 2                               | 0       | 0       | 2     |
| Swedish  | Mother         | 5                      | 3     | 2     | 5                               | 0       | 1       | 4     |
| Swedish  | Other adults   | 3                      | 1     | 2     | 3                               | 0       | 1       | 2     |

Methods (other than the normalization) and format are the same as in Table 6.

**Table 13. The dependency between  $\alpha$  and age: length normalization by random sampling with  $n^* = 50$** 

| Language | Role class     | Sign of the dependency |       |       | Significance of the correlation |         |         |       |
|----------|----------------|------------------------|-------|-------|---------------------------------|---------|---------|-------|
|          |                | $N$                    | $N_+$ | $N_-$ | $N$                             | $N_+^S$ | $N_-^S$ | $N_?$ |
| All      | Target child   | 99                     | 9 ↓   | 90 ↑  | 99                              | 1       | 52 ↑    | 46 ↓  |
| All      | Father         | 23                     | 7 ↓   | 16 ↑  | 23                              | 0       | 1       | 22    |
| All      | Investigator   | 39                     | 15    | 24    | 39                              | 0       | 2       | 37    |
| All      | Mother         | 47                     | 9 ↓   | 38 ↑  | 47                              | 0       | 8 ↑     | 39 ↓  |
| All      | Other adults   | 25                     | 12    | 13    | 25                              | 0       | 4 ↑     | 21 ↓  |
| All      | Other children | 11                     | 2 ↓   | 9 ↑   | 11                              | 0       | 1       | 10    |
| All      | Remainder      | 1                      | 0     | 1     | 1                               | 0       | 0       | 1     |
| Dutch    | Target child   | 14                     | 2 ↓   | 12 ↑  | 14                              | 0       | 8 ↑     | 6 ↓   |
| Dutch    | Father         | 4                      | 1     | 3     | 4                               | 0       | 0       | 4     |
| Dutch    | Investigator   | 6                      | 2     | 4     | 6                               | 0       | 0       | 6     |
| Dutch    | Mother         | 7                      | 0 ↓   | 7 ↑   | 7                               | 0       | 1       | 6     |
| English  | Target child   | 56                     | 5 ↓   | 51 ↑  | 56                              | 1       | 29 ↑    | 26 ↓  |
| English  | Father         | 12                     | 2 ↓   | 10 ↑  | 12                              | 0       | 0       | 12    |
| English  | Investigator   | 24                     | 10    | 14    | 24                              | 0       | 1       | 23    |
| English  | Mother         | 26                     | 5 ↓   | 21 ↑  | 26                              | 0       | 5 ↑     | 21 ↓  |
| English  | Other adults   | 18                     | 9     | 9     | 18                              | 0       | 2       | 16    |
| English  | Other children | 9                      | 1 ↓   | 8 ↑   | 9                               | 0       | 1       | 8     |
| English  | Remainder      | 1                      | 0     | 1     | 1                               | 0       | 0       | 1     |
| German   | Target child   | 24                     | 1 ↓   | 23 ↑  | 24                              | 0       | 11 ↑    | 13 ↓  |
| German   | Father         | 4                      | 2     | 2     | 4                               | 0       | 0       | 4     |
| German   | Investigator   | 9                      | 3     | 6     | 9                               | 0       | 1       | 8     |
| German   | Mother         | 9                      | 3     | 6     | 9                               | 0       | 1       | 8     |
| German   | Other adults   | 4                      | 1     | 3     | 4                               | 0       | 1       | 3     |
| German   | Other children | 2                      | 1     | 1     | 2                               | 0       | 0       | 2     |
| Swedish  | Target child   | 5                      | 1     | 4     | 5                               | 0       | 4 ↑     | 1 ↓   |
| Swedish  | Father         | 3                      | 2     | 1     | 3                               | 0       | 1       | 2     |
| Swedish  | Mother         | 5                      | 1     | 4     | 5                               | 0       | 1       | 4     |
| Swedish  | Other adults   | 3                      | 2     | 1     | 3                               | 0       | 1       | 2     |

Methods (other than the normalization) and format are the same as in Table 6.

**Table 14. The dependency between  $\alpha$  and age: length normalization by random sampling with  $n^* = 100$** 

| Language | Role class     | Sign of the dependency |       |       | Significance of the correlation |         |         |       |
|----------|----------------|------------------------|-------|-------|---------------------------------|---------|---------|-------|
|          |                | $N$                    | $N_+$ | $N_-$ | $N$                             | $N_+^S$ | $N_-^S$ | $N_?$ |
| All      | Target child   | 85                     | 12 ↓  | 73 ↑  | 85                              | 4       | 44 ↑    | 37 ↓  |
| All      | Father         | 19                     | 4 ↓   | 15 ↑  | 19                              | 0       | 2       | 17    |
| All      | Investigator   | 25                     | 9     | 16    | 25                              | 0       | 5 ↑     | 20 ↓  |
| All      | Mother         | 47                     | 12 ↓  | 35 ↑  | 47                              | 0       | 14 ↑    | 33 ↓  |
| All      | Other adults   | 15                     | 3 ↓   | 12 ↑  | 15                              | 0       | 2       | 13    |
| All      | Other children | 5                      | 1     | 4     | 5                               | 0       | 0       | 5     |
| All      | Remainder      | 1                      | 0     | 1     | 1                               | 0       | 0       | 1     |
| Dutch    | Target child   | 14                     | 1 ↓   | 13 ↑  | 14                              | 1       | 6 ↑     | 7 ↓   |
| Dutch    | Father         | 4                      | 1     | 3     | 4                               | 0       | 0       | 4     |
| Dutch    | Investigator   | 6                      | 2     | 4     | 6                               | 0       | 2 ↑     | 4 ↓   |
| Dutch    | Mother         | 7                      | 2     | 5     | 7                               | 0       | 1       | 6     |
| English  | Target child   | 46                     | 8 ↓   | 38 ↑  | 46                              | 2       | 23 ↑    | 21 ↓  |
| English  | Father         | 10                     | 1 ↓   | 9 ↑   | 10                              | 0       | 1       | 9     |
| English  | Investigator   | 15                     | 6     | 9     | 15                              | 0       | 2       | 13    |
| English  | Mother         | 26                     | 8 ↓   | 18 ↑  | 26                              | 0       | 11 ↑    | 15 ↓  |
| English  | Other adults   | 8                      | 2     | 6     | 8                               | 0       | 0       | 8     |
| English  | Other children | 3                      | 1     | 2     | 3                               | 0       | 0       | 3     |
| English  | Remainder      | 1                      | 0     | 1     | 1                               | 0       | 0       | 1     |
| German   | Target child   | 20                     | 2 ↓   | 18 ↑  | 20                              | 0       | 11 ↑    | 9 ↓   |
| German   | Father         | 3                      | 2     | 1     | 3                               | 0       | 0       | 3     |
| German   | Investigator   | 4                      | 1     | 3     | 4                               | 0       | 1       | 3     |
| German   | Mother         | 9                      | 2     | 7     | 9                               | 0       | 1       | 8     |
| German   | Other adults   | 4                      | 1     | 3     | 4                               | 0       | 2 ↑     | 2 ↓   |
| German   | Other children | 2                      | 0     | 2     | 2                               | 0       | 0       | 2     |
| Swedish  | Target child   | 5                      | 1     | 4     | 5                               | 1       | 4 ↑     | 0 ↓   |
| Swedish  | Father         | 2                      | 0     | 2     | 2                               | 0       | 1 ↑     | 1     |
| Swedish  | Mother         | 5                      | 0 ↓   | 5 ↑   | 5                               | 0       | 1       | 4     |
| Swedish  | Other adults   | 3                      | 0     | 3     | 3                               | 0       | 0       | 3     |

Methods (other than the normalization) and format are the same as in Table 6.

The analysis of the sign of the correlation between  $r_M$  and age confirms the tendency of  $r_M$  to increase over time:  $N_-$  is never significantly high while  $N_+$  is significantly large in the majority of target children with the only exception of Swedish, where the number of target children is very small, and also significantly large in investigators, parents and other adults depending on the language (Tables 15 and 16). If the significance of the correlation between  $r_M$  and age is taken into account, then it turns out that  $N_-^S$  is very small (zero in the majority of cases), and never significantly large (Tables 15 and



16). Interestingly,  $N_+^S$  is significantly large for all target children. With regard to  $\alpha$  versus time, the ratio  $N_+^S/N$  (where  $N = N_+^S + N_-^S + N_?$ ) is more balanced between target children and the adults where  $N_+^S$  is significantly large. These results confirm the previous finding based upon prefix normalization: that the increase of  $r_M$  with time does not distinguish children from adults as clearly as  $\alpha$  and also confirm that prefix normalization is not omitting vital information.

**Table 15. The dependency between  $r_M$  and age: length normalization by random sampling with  $T^* = 250$** 

| Language | Role class     | Sign of the dependency |       |       | Significance of the correlation |         |         |       |
|----------|----------------|------------------------|-------|-------|---------------------------------|---------|---------|-------|
|          |                | $N$                    | $N_+$ | $N_-$ | $N$                             | $N_+^S$ | $N_-^S$ | $N_?$ |
| All      | Target child   | 90                     | 80 ↑  | 10 ↓  | 90                              | 55 ↑    | 2       | 33 ↓  |
| All      | Father         | 20                     | 18 ↑  | 2 ↓   | 20                              | 3 ↑     | 0       | 17    |
| All      | Investigator   | 24                     | 18 ↑  | 6 ↓   | 24                              | 8 ↑     | 0       | 16 ↓  |
| All      | Mother         | 47                     | 39 ↑  | 8 ↓   | 47                              | 16 ↑    | 0       | 31 ↓  |
| All      | Other adults   | 13                     | 13 ↑  | 0 ↓   | 13                              | 3 ↑     | 0       | 10 ↓  |
| All      | Other children | 5                      | 5 ↑   | 0 ↓   | 5                               | 0       | 0       | 5     |
| All      | Remainder      | 1                      | 1     | 0     | 1                               | 1 ↑     | 0       | 0 ↓   |
| Dutch    | Target child   | 14                     | 13 ↑  | 1 ↓   | 14                              | 9 ↑     | 1       | 4 ↓   |
| Dutch    | Father         | 4                      | 4     | 0     | 4                               | 0       | 0       | 4     |
| Dutch    | Investigator   | 6                      | 3     | 3     | 6                               | 1       | 0       | 5     |
| Dutch    | Mother         | 7                      | 5     | 2     | 7                               | 2 ↑     | 0       | 5 ↓   |
| English  | Target child   | 47                     | 42 ↑  | 5 ↓   | 47                              | 32 ↑    | 1       | 14 ↓  |
| English  | Father         | 10                     | 10 ↑  | 0 ↓   | 10                              | 1       | 0       | 9     |
| English  | Investigator   | 15                     | 12 ↑  | 3 ↓   | 15                              | 5 ↑     | 0       | 10 ↓  |
| English  | Mother         | 26                     | 21 ↑  | 5 ↓   | 26                              | 11 ↑    | 0       | 15 ↓  |
| English  | Other adults   | 6                      | 6 ↑   | 0 ↓   | 6                               | 1       | 0       | 5     |
| English  | Other children | 3                      | 3     | 0     | 3                               | 0       | 0       | 3     |
| English  | Remainder      | 1                      | 1     | 0     | 1                               | 1 ↑     | 0       | 0     |
| German   | Target child   | 24                     | 21 ↑  | 3 ↓   | 24                              | 11 ↑    | 0       | 13 ↓  |
| German   | Father         | 3                      | 2     | 1     | 3                               | 1       | 0       | 2     |
| German   | Investigator   | 3                      | 3     | 0     | 3                               | 2 ↑     | 0       | 1 ↓   |
| German   | Mother         | 9                      | 8 ↑   | 1 ↓   | 9                               | 1       | 0       | 8     |
| German   | Other adults   | 4                      | 4     | 0     | 4                               | 1       | 0       | 3     |
| German   | Other children | 2                      | 2     | 0     | 2                               | 0       | 0       | 2     |
| Swedish  | Target child   | 5                      | 4     | 1     | 5                               | 3 ↑     | 0       | 2 ↓   |
| Swedish  | Father         | 3                      | 2     | 1     | 3                               | 1       | 0       | 2     |
| Swedish  | Mother         | 5                      | 5 ↑   | 0 ↓   | 5                               | 2 ↑     | 0       | 3 ↓   |
| Swedish  | Other adults   | 3                      | 3     | 0     | 3                               | 1       | 0       | 2     |

Methods (other than the normalization and the target parameter) and format are the same as in Table 6.

**Table 16. The dependency between  $r_M$  and age: length normalization by random sampling with  $T^* = 500$** 

| Language | Role class     | Sign of the dependency |       |       | Significance of the correlation |         |         |       |
|----------|----------------|------------------------|-------|-------|---------------------------------|---------|---------|-------|
|          |                | $N$                    | $N_+$ | $N_-$ | $N$                             | $N_+^S$ | $N_-^S$ | $N_?$ |
| All      | Target child   | 71                     | 65 ↑  | 6 ↓   | 71                              | 45 ↑    | 2       | 24 ↓  |
| All      | Father         | 14                     | 13 ↑  | 1 ↓   | 14                              | 7 ↑     | 0       | 7 ↓   |
| All      | Investigator   | 17                     | 11    | 6     | 17                              | 4 ↑     | 0       | 13 ↓  |
| All      | Mother         | 47                     | 40 ↑  | 7 ↓   | 47                              | 19 ↑    | 0       | 28 ↓  |
| All      | Other adults   | 8                      | 8 ↑   | 0 ↓   | 8                               | 2 ↑     | 0       | 6     |
| All      | Other children | 2                      | 2     | 0     | 2                               | 0       | 0       | 2     |
| Dutch    | Target child   | 12                     | 11 ↑  | 1 ↓   | 12                              | 7 ↑     | 1       | 4 ↓   |
| Dutch    | Father         | 2                      | 2     | 0     | 2                               | 1 ↑     | 0       | 1     |
| Dutch    | Investigator   | 6                      | 3     | 3     | 6                               | 0       | 0       | 6     |
| Dutch    | Mother         | 7                      | 5     | 2     | 7                               | 1       | 0       | 6     |
| English  | Target child   | 34                     | 32 ↑  | 2 ↓   | 34                              | 25 ↑    | 0       | 9 ↓   |
| English  | Father         | 7                      | 7 ↑   | 0 ↓   | 7                               | 5 ↑     | 0       | 2 ↓   |
| English  | Investigator   | 8                      | 5     | 3     | 8                               | 2 ↑     | 0       | 6     |
| English  | Mother         | 26                     | 22 ↑  | 4 ↓   | 26                              | 12 ↑    | 0       | 14 ↓  |
| English  | Other adults   | 2                      | 2     | 0     | 2                               | 0       | 0       | 2     |
| German   | Target child   | 20                     | 18 ↑  | 2 ↓   | 20                              | 11 ↑    | 0       | 9 ↓   |
| German   | Father         | 3                      | 2     | 1     | 3                               | 1       | 0       | 2     |
| German   | Investigator   | 3                      | 3     | 0     | 3                               | 2 ↑     | 0       | 1 ↓   |
| German   | Mother         | 9                      | 9 ↑   | 0 ↓   | 9                               | 3 ↑     | 0       | 6 ↓   |
| German   | Other adults   | 3                      | 3     | 0     | 3                               | 1       | 0       | 2     |
| German   | Other children | 2                      | 2     | 0     | 2                               | 0       | 0       | 2     |
| Swedish  | Target child   | 5                      | 4     | 1     | 5                               | 2 ↑     | 1       | 2 ↓   |
| Swedish  | Father         | 2                      | 2     | 0     | 2                               | 0       | 0       | 2     |
| Swedish  | Mother         | 5                      | 4     | 1     | 5                               | 3 ↑     | 0       | 2 ↓   |
| Swedish  | Other adults   | 3                      | 3     | 0     | 3                               | 1       | 0       | 2     |

Methods (other than the normalization and the target parameter) and format are the same as in Table 6.

#### 4. The right-truncated zeta distribution: $\alpha = 1$ versus free $\alpha$

For each corpus and major class of role (target child, father, investigator and mother), a comparison of the quality of the fit of the two theoretical distributions, i.e. the right-truncated zeta distribution (with two parameters  $\alpha$  and  $r_M$ ) and a right-truncated zeta distribution with only one parameter, i.e.  $r_M$  ( $\alpha = 1$ ), is made. The control right-truncated distribution with  $\alpha = 1$  was also fitted by maximum likelihood. The maximum likelihood estimator of  $r_M$  coincides with  $n$ , the maximum rank of the sample.

To see it, consider Eq. 6 of the main text with  $\alpha = 1$ ,  $n > 1$  and notice that  $H(r_M, 1)$  is a monotonically increasing function of  $r_M$ . The quality of the fit was evaluated using Akaike's Information Criterion (AIC), a metric that combines a quantitative measure of the goodness of the fit to the real data with a penalty for the number of parameters used [2]. In our analysis, we adopted a variant that incorporates a correction for small samples which is defined as [3]

$$AIC_k = -2\log(\mathcal{L}) + 2k\frac{T}{T - k - 1}, \quad (1)$$

where  $k$  is the number of free parameters of the right-truncated zeta distribution ( $n = 1$  or  $n = 2$  in our case),  $T$  is the length of the text sample in words and  $\mathcal{L}$  is the log-likelihood as it is defined in the main article. The lower the value of  $AIC_k$  of a model with regard to that of alternative models, the better the model.

If no size/length normalization is used, the right-truncated distribution with two parameters gives a better fit in the majority of cases (Table 17).

#### 4.1. Normalization by constant length in words

If fragments of the same  $T$  (i.e the same length in words) are considered, the right-truncated distribution of two parameters is better than that of one parameter taking a prefix of length  $T^*$  for each time point (see Table 18 for  $T^* = 250$  and Table 19 for  $T^* = 500$ ) or taking a random sample of size  $T^*$  (see Table 20 for  $T^* = 250$  and Table 21 for  $T^* = 500$ ).

#### 4.2. Normalization by constant number of different words

If fragments of the same  $n$  (i.e. the same number of different words) are considered, the right-truncated distribution of two parameters is better than that of one parameter taking a prefix of  $n^*$  different words for each time point (see Table 22 for  $n^* = 50$  and Table 23 for  $n^* = 100$ ) or taking a random sample of  $n^*$  different words (see Table 24 for  $n^* = 50$  and Table 25 for  $n^* = 100$ ).

#### 4.3. Brief discussion

For all the normalizations considered above and given a language and a class of role, the percentage of cases where the one parameter truncated zeta distribution yields a better fit than the two parameter version is less than 7%. Interestingly, the success of the two parameters drops when no normalization is used, e.g., various combinations of language and role class reach at least 7 in the percentage of times where the one parameter function is better than the two parameter version (recall Table 17). This suggests that normalization improves the adequacy of the truncated zeta distribution with two parameters but this could be simply due to the loss of individuals producing small samples. A sample that is too small may not contain enough information to discriminate accurately between the one and the two parameter version and may

**Table 17. The right-truncated zeta distribution of one parameter versus that of two parameters**

| Language | Role class     | $AIC_1 < AIC_2$ | $AIC_1 > AIC_2$ | $AIC_1 = AIC_2$ |
|----------|----------------|-----------------|-----------------|-----------------|
| All      | Target child   | 4.24            | 95.76           | 0.00            |
| All      | Father         | 3.23            | 96.77           | 0.00            |
| All      | Investigator   | 2.71            | 97.29           | 0.00            |
| All      | Mother         | 0.63            | 99.37           | 0.00            |
| All      | Other adults   | 7.11            | 92.89           | 0.00            |
| All      | Other children | 19.71           | 80.29           | 0.00            |
| All      | Remainder      | 20.17           | 79.83           | 0.00            |
| Dutch    | Target child   | 2.63            | 97.37           | 0.00            |
| Dutch    | Father         | 0.00            | 100.00          | 0.00            |
| Dutch    | Investigator   | 0.00            | 100.00          | 0.00            |
| Dutch    | Mother         | 0.00            | 100.00          | 0.00            |
| Dutch    | Other children | 56.00           | 44.00           | 0.00            |
| English  | Target child   | 3.54            | 96.46           | 0.00            |
| English  | Father         | 3.34            | 96.66           | 0.00            |
| English  | Investigator   | 2.12            | 97.88           | 0.00            |
| English  | Mother         | 0.19            | 99.81           | 0.00            |
| English  | Other adults   | 11.06           | 88.94           | 0.00            |
| English  | Other children | 14.79           | 85.21           | 0.00            |
| English  | Remainder      | 20.51           | 79.49           | 0.00            |
| German   | Target child   | 5.60            | 94.40           | 0.00            |
| German   | Father         | 4.21            | 95.79           | 0.00            |
| German   | Investigator   | 7.49            | 92.51           | 0.00            |
| German   | Mother         | 1.72            | 98.28           | 0.00            |
| German   | Other adults   | 1.89            | 98.11           | 0.00            |
| German   | Other children | 17.76           | 82.24           | 0.00            |
| German   | Remainder      | 0.00            | 100.00          | 0.00            |
| Swedish  | Target child   | 6.40            | 93.60           | 0.00            |
| Swedish  | Father         | 0.00            | 100.00          | 0.00            |
| Swedish  | Mother         | 0.00            | 100.00          | 0.00            |
| Swedish  | Other adults   | 1.64            | 98.36           | 0.00            |

$AIC_1$  and  $AIC_2$  are, respectively, the corrected Akaike information criterion for the right-truncated zeta distribution with two parameters ( $\alpha$  and  $r_M$ ) and that of one parameter ( $\alpha = 1$  and free  $r_M$ ). For each language category and role class, the percentage of times (over all the available individual - age pairs where the fit can be performed) that  $AIC_1 < AIC_2$ ,  $AIC_1 > AIC_2$  and  $AIC_1 = AIC_2$  are shown.

not reach the cut-off imposed for normalization. In fact, various classes of roles do not survive normalization (they are present in Table 17 but disappeared in normalization

**Table 18. The right-truncated zeta distribution of one parameter versus that of two parameters: prefixes of constant  $T^* = 250$**

| Language | Role class     | $AIC_1 < AIC_2$ | $AIC_1 > AIC_2$ | $AIC_1 = AIC_2$ |
|----------|----------------|-----------------|-----------------|-----------------|
| All      | Target child   | 3.85            | 96.15           | 0.00            |
| All      | Father         | 0.00            | 100.00          | 0.00            |
| All      | Investigator   | 0.82            | 99.18           | 0.00            |
| All      | Mother         | 0.35            | 99.65           | 0.00            |
| All      | Other adults   | 0.00            | 100.00          | 0.00            |
| All      | Other children | 2.08            | 97.92           | 0.00            |
| All      | Remainder      | 0.00            | 100.00          | 0.00            |
| Dutch    | Target child   | 1.17            | 98.83           | 0.00            |
| Dutch    | Father         | 0.00            | 100.00          | 0.00            |
| Dutch    | Investigator   | 0.00            | 100.00          | 0.00            |
| Dutch    | Mother         | 0.00            | 100.00          | 0.00            |
| English  | Target child   | 4.43            | 95.57           | 0.00            |
| English  | Father         | 0.00            | 100.00          | 0.00            |
| English  | Investigator   | 0.00            | 100.00          | 0.00            |
| English  | Mother         | 0.29            | 99.71           | 0.00            |
| English  | Other adults   | 0.00            | 100.00          | 0.00            |
| English  | Other children | 3.23            | 96.77           | 0.00            |
| English  | Remainder      | 0.00            | 100.00          | 0.00            |
| German   | Target child   | 3.42            | 96.58           | 0.00            |
| German   | Father         | 0.00            | 100.00          | 0.00            |
| German   | Investigator   | 4.49            | 95.51           | 0.00            |
| German   | Mother         | 0.65            | 99.35           | 0.00            |
| German   | Other adults   | 0.00            | 100.00          | 0.00            |
| German   | Other children | 1.54            | 98.46           | 0.00            |
| Swedish  | Target child   | 5.99            | 94.01           | 0.00            |
| Swedish  | Father         | 0.00            | 100.00          | 0.00            |
| Swedish  | Mother         | 0.00            | 100.00          | 0.00            |
| Swedish  | Other adults   | 0.00            | 100.00          | 0.00            |

Comparison of AICs for prefixes of the same length  $T$  in words ( $T^* = 250$ ). The same format as in Table 17 is adopted.

tables).

**Table 19. The right-truncated zeta distribution of one parameter versus that of two parameters: prefixes of constant  $T^* = 500$**

| Language | Role class     | $AIC_1 < AIC_2$ | $AIC_1 > AIC_2$ | $AIC_1 = AIC_2$ |
|----------|----------------|-----------------|-----------------|-----------------|
| All      | Target child   | 3.16            | 96.84           | 0.00            |
| All      | Father         | 1.01            | 98.99           | 0.00            |
| All      | Investigator   | 0.31            | 99.69           | 0.00            |
| All      | Mother         | 0.17            | 99.83           | 0.00            |
| All      | Other adults   | 0.00            | 100.00          | 0.00            |
| All      | Other children | 0.00            | 100.00          | 0.00            |
| All      | Remainder      | 0.00            | 100.00          | 0.00            |
| Dutch    | Target child   | 0.35            | 99.65           | 0.00            |
| Dutch    | Father         | 0.00            | 100.00          | 0.00            |
| Dutch    | Investigator   | 0.00            | 100.00          | 0.00            |
| Dutch    | Mother         | 0.00            | 100.00          | 0.00            |
| English  | Target child   | 3.47            | 96.53           | 0.00            |
| English  | Father         | 0.00            | 100.00          | 0.00            |
| English  | Investigator   | 0.00            | 100.00          | 0.00            |
| English  | Mother         | 0.25            | 99.75           | 0.00            |
| English  | Other adults   | 0.00            | 100.00          | 0.00            |
| English  | Other children | 0.00            | 100.00          | 0.00            |
| English  | Remainder      | 0.00            | 100.00          | 0.00            |
| German   | Target child   | 3.74            | 96.26           | 0.00            |
| German   | Father         | 2.92            | 97.08           | 0.00            |
| German   | Investigator   | 2.00            | 98.00           | 0.00            |
| German   | Mother         | 0.14            | 99.86           | 0.00            |
| German   | Other adults   | 0.00            | 100.00          | 0.00            |
| German   | Other children | 0.00            | 100.00          | 0.00            |
| Swedish  | Target child   | 2.80            | 97.20           | 0.00            |
| Swedish  | Father         | 0.00            | 100.00          | 0.00            |
| Swedish  | Mother         | 0.00            | 100.00          | 0.00            |
| Swedish  | Other adults   | 0.00            | 100.00          | 0.00            |

Comparison of AICs for prefixes of the same length  $T$  in words ( $T^* = 500$ ). The same format as in Table 17 is adopted.

**Table 20. The right-truncated zeta distribution of one parameter versus that of two parameters: random samples of constant  $T^* = 250$**

| Language | Role class     | $AIC_1 < AIC_2$ | $AIC_1 > AIC_2$ | $AIC_1 = AIC_2$ |
|----------|----------------|-----------------|-----------------|-----------------|
| All      | Target child   | 2.36            | 97.64           | 0.00            |
| All      | Father         | 0.00            | 100.00          | 0.00            |
| All      | Investigator   | 0.41            | 99.59           | 0.00            |
| All      | Mother         | 0.12            | 99.88           | 0.00            |
| All      | Other adults   | 0.00            | 100.00          | 0.00            |
| All      | Other children | 1.04            | 98.96           | 0.00            |
| All      | Remainder      | 0.00            | 100.00          | 0.00            |
| Dutch    | Target child   | 0.00            | 100.00          | 0.00            |
| Dutch    | Father         | 0.00            | 100.00          | 0.00            |
| Dutch    | Investigator   | 0.00            | 100.00          | 0.00            |
| Dutch    | Mother         | 0.00            | 100.00          | 0.00            |
| English  | Target child   | 3.05            | 96.95           | 0.00            |
| English  | Father         | 0.00            | 100.00          | 0.00            |
| English  | Investigator   | 0.00            | 100.00          | 0.00            |
| English  | Mother         | 0.07            | 99.93           | 0.00            |
| English  | Other adults   | 0.00            | 100.00          | 0.00            |
| English  | Other children | 3.23            | 96.77           | 0.00            |
| English  | Remainder      | 0.00            | 100.00          | 0.00            |
| German   | Target child   | 1.89            | 98.11           | 0.00            |
| German   | Father         | 0.00            | 100.00          | 0.00            |
| German   | Investigator   | 2.25            | 97.75           | 0.00            |
| German   | Mother         | 0.26            | 99.74           | 0.00            |
| German   | Other adults   | 0.00            | 100.00          | 0.00            |
| German   | Other children | 0.00            | 100.00          | 0.00            |
| Swedish  | Target child   | 2.99            | 97.01           | 0.00            |
| Swedish  | Father         | 0.00            | 100.00          | 0.00            |
| Swedish  | Mother         | 0.00            | 100.00          | 0.00            |
| Swedish  | Other adults   | 0.00            | 100.00          | 0.00            |

Comparison of AICs for random samples of the same length  $T$  in words ( $T^* = 250$ ). The same format as in Table 17 is adopted.



**Table 21. The right-truncated zeta distribution of one parameter versus that of two parameters: random samples of constant  $T^* = 500$**

| Language | Role class     | $AIC_1 < AIC_2$ | $AIC_1 > AIC_2$ | $AIC_1 = AIC_2$ |
|----------|----------------|-----------------|-----------------|-----------------|
| All      | Target child   | 2.38            | 97.62           | 0.00            |
| All      | Father         | 1.01            | 98.99           | 0.00            |
| All      | Investigator   | 0.31            | 99.69           | 0.00            |
| All      | Mother         | 0.00            | 100.00          | 0.00            |
| All      | Other adults   | 0.00            | 100.00          | 0.00            |
| All      | Other children | 0.00            | 100.00          | 0.00            |
| All      | Remainder      | 0.00            | 100.00          | 0.00            |
| Dutch    | Target child   | 0.35            | 99.65           | 0.00            |
| Dutch    | Father         | 0.00            | 100.00          | 0.00            |
| Dutch    | Investigator   | 0.00            | 100.00          | 0.00            |
| Dutch    | Mother         | 0.00            | 100.00          | 0.00            |
| English  | Target child   | 3.18            | 96.82           | 0.00            |
| English  | Father         | 0.00            | 100.00          | 0.00            |
| English  | Investigator   | 0.00            | 100.00          | 0.00            |
| English  | Mother         | 0.00            | 100.00          | 0.00            |
| English  | Other adults   | 0.00            | 100.00          | 0.00            |
| English  | Other children | 0.00            | 100.00          | 0.00            |
| English  | Remainder      | 0.00            | 100.00          | 0.00            |
| German   | Target child   | 1.74            | 98.26           | 0.00            |
| German   | Father         | 2.92            | 97.08           | 0.00            |
| German   | Investigator   | 2.00            | 98.00           | 0.00            |
| German   | Mother         | 0.00            | 100.00          | 0.00            |
| German   | Other adults   | 0.00            | 100.00          | 0.00            |
| German   | Other children | 0.00            | 100.00          | 0.00            |
| Swedish  | Target child   | 2.10            | 97.90           | 0.00            |
| Swedish  | Father         | 0.00            | 100.00          | 0.00            |
| Swedish  | Mother         | 0.00            | 100.00          | 0.00            |
| Swedish  | Other adults   | 0.00            | 100.00          | 0.00            |

Comparison of AICs for random samples of the same length  $T$  in words ( $T^* = 500$ ). The same format as in Table 17 is adopted.

**Table 22. The right-truncated zeta distribution of one parameter versus that of two parameters: prefixes of constant  $n^* = 50$**

| Language | Role class     | $AIC_1 < AIC_2$ | $AIC_1 > AIC_2$ | $AIC_1 = AIC_2$ |
|----------|----------------|-----------------|-----------------|-----------------|
| All      | Target child   | 4.61            | 95.39           | 0.00            |
| All      | Father         | 1.05            | 98.95           | 0.00            |
| All      | Investigator   | 1.12            | 98.88           | 0.00            |
| All      | Mother         | 0.95            | 99.05           | 0.00            |
| All      | Other adults   | 0.80            | 99.20           | 0.00            |
| All      | Other children | 2.16            | 97.84           | 0.00            |
| All      | Remainder      | 4.76            | 95.24           | 0.00            |
| Dutch    | Target child   | 1.91            | 98.09           | 0.00            |
| Dutch    | Father         | 0.00            | 100.00          | 0.00            |
| Dutch    | Investigator   | 0.00            | 100.00          | 0.00            |
| Dutch    | Mother         | 0.00            | 100.00          | 0.00            |
| English  | Target child   | 6.04            | 93.96           | 0.00            |
| English  | Father         | 1.17            | 98.83           | 0.00            |
| English  | Investigator   | 0.22            | 99.78           | 0.00            |
| English  | Mother         | 1.06            | 98.94           | 0.00            |
| English  | Other adults   | 0.93            | 99.07           | 0.00            |
| English  | Other children | 4.35            | 95.65           | 0.00            |
| English  | Remainder      | 4.76            | 95.24           | 0.00            |
| German   | Target child   | 3.29            | 96.71           | 0.00            |
| German   | Father         | 1.18            | 98.82           | 0.00            |
| German   | Investigator   | 5.26            | 94.74           | 0.00            |
| German   | Mother         | 1.22            | 98.78           | 0.00            |
| German   | Other adults   | 0.85            | 99.15           | 0.00            |
| German   | Other children | 0.00            | 100.00          | 0.00            |
| Swedish  | Target child   | 4.12            | 95.88           | 0.00            |
| Swedish  | Father         | 0.00            | 100.00          | 0.00            |
| Swedish  | Mother         | 0.00            | 100.00          | 0.00            |
| Swedish  | Other adults   | 0.00            | 100.00          | 0.00            |

Comparison of AICs for prefixes of the same number  $n$  of different words ( $n^* = 50$ ). The same format as in Table 17 is adopted.

**Table 23.** The right-truncated zeta distribution of one parameter versus that of two parameters: prefixes of constant  $n^* = 100$

| Language | Role class     | $AIC_1 < AIC_2$ | $AIC_1 > AIC_2$ | $AIC_1 = AIC_2$ |
|----------|----------------|-----------------|-----------------|-----------------|
| All      | Target child   | 4.61            | 95.39           | 0.00            |
| All      | Father         | 1.05            | 98.95           | 0.00            |
| All      | Investigator   | 1.12            | 98.88           | 0.00            |
| All      | Mother         | 0.95            | 99.05           | 0.00            |
| All      | Other adults   | 0.80            | 99.20           | 0.00            |
| All      | Other children | 2.16            | 97.84           | 0.00            |
| All      | Remainder      | 4.76            | 95.24           | 0.00            |
| Dutch    | Target child   | 1.91            | 98.09           | 0.00            |
| Dutch    | Father         | 0.00            | 100.00          | 0.00            |
| Dutch    | Investigator   | 0.00            | 100.00          | 0.00            |
| Dutch    | Mother         | 0.00            | 100.00          | 0.00            |
| English  | Target child   | 6.04            | 93.96           | 0.00            |
| English  | Father         | 1.17            | 98.83           | 0.00            |
| English  | Investigator   | 0.22            | 99.78           | 0.00            |
| English  | Mother         | 1.06            | 98.94           | 0.00            |
| English  | Other adults   | 0.93            | 99.07           | 0.00            |
| English  | Other children | 4.35            | 95.65           | 0.00            |
| English  | Remainder      | 4.76            | 95.24           | 0.00            |
| German   | Target child   | 3.29            | 96.71           | 0.00            |
| German   | Father         | 1.18            | 98.82           | 0.00            |
| German   | Investigator   | 5.26            | 94.74           | 0.00            |
| German   | Mother         | 1.22            | 98.78           | 0.00            |
| German   | Other adults   | 0.85            | 99.15           | 0.00            |
| German   | Other children | 0.00            | 100.00          | 0.00            |
| Swedish  | Target child   | 4.12            | 95.88           | 0.00            |
| Swedish  | Father         | 0.00            | 100.00          | 0.00            |
| Swedish  | Mother         | 0.00            | 100.00          | 0.00            |
| Swedish  | Other adults   | 0.00            | 100.00          | 0.00            |

Comparison of AICs for prefixes of the same number  $n$  of different words ( $n^* = 100$ ). The same format as in Table 17 is adopted.

**Table 24. The right-truncated zeta distribution of one parameter versus that of two parameters: random samples of constant  $n^* = 50$**

| Language | Role class     | $AIC_1 < AIC_2$ | $AIC_1 > AIC_2$ | $AIC_1 = AIC_2$ |
|----------|----------------|-----------------|-----------------|-----------------|
| All      | Target child   | 2.24            | 97.76           | 0.00            |
| All      | Father         | 0.00            | 100.00          | 0.00            |
| All      | Investigator   | 1.00            | 99.00           | 0.00            |
| All      | Mother         | 0.11            | 99.89           | 0.00            |
| All      | Other adults   | 0.00            | 100.00          | 0.00            |
| All      | Other children | 0.00            | 100.00          | 0.00            |
| All      | Remainder      | 0.00            | 100.00          | 0.00            |
| Dutch    | Target child   | 1.09            | 98.91           | 0.00            |
| Dutch    | Father         | 0.00            | 100.00          | 0.00            |
| Dutch    | Investigator   | 0.00            | 100.00          | 0.00            |
| Dutch    | Mother         | 0.00            | 100.00          | 0.00            |
| English  | Target child   | 2.36            | 97.64           | 0.00            |
| English  | Father         | 0.00            | 100.00          | 0.00            |
| English  | Investigator   | 0.22            | 99.78           | 0.00            |
| English  | Mother         | 0.07            | 99.93           | 0.00            |
| English  | Other adults   | 0.00            | 100.00          | 0.00            |
| English  | Other children | 0.00            | 100.00          | 0.00            |
| English  | Remainder      | 0.00            | 100.00          | 0.00            |
| German   | Target child   | 2.36            | 97.64           | 0.00            |
| German   | Father         | 0.00            | 100.00          | 0.00            |
| German   | Investigator   | 4.61            | 95.39           | 0.00            |
| German   | Mother         | 0.24            | 99.76           | 0.00            |
| German   | Other adults   | 0.00            | 100.00          | 0.00            |
| German   | Other children | 0.00            | 100.00          | 0.00            |
| Swedish  | Target child   | 2.94            | 97.06           | 0.00            |
| Swedish  | Father         | 0.00            | 100.00          | 0.00            |
| Swedish  | Mother         | 0.00            | 100.00          | 0.00            |
| Swedish  | Other adults   | 0.00            | 100.00          | 0.00            |

Comparison of AICs for random samples of the same number  $n$  of different words ( $n^* = 50$ ). The same format as in Table 17 is adopted.

**Table 25. The right-truncated zeta distribution of one parameter versus that of two parameters: random samples of constant  $n^* = 100$**

| Language | Role class     | $AIC_1 < AIC_2$ | $AIC_1 > AIC_2$ | $AIC_1 = AIC_2$ |
|----------|----------------|-----------------|-----------------|-----------------|
| All      | Target child   | 1.60            | 98.40           | 0.00            |
| All      | Father         | 0.17            | 99.83           | 0.00            |
| All      | Investigator   | 0.55            | 99.45           | 0.00            |
| All      | Mother         | 0.08            | 99.92           | 0.00            |
| All      | Other adults   | 0.00            | 100.00          | 0.00            |
| All      | Other children | 0.00            | 100.00          | 0.00            |
| All      | Remainder      | 0.00            | 100.00          | 0.00            |
| Dutch    | Target child   | 0.00            | 100.00          | 0.00            |
| Dutch    | Father         | 0.00            | 100.00          | 0.00            |
| Dutch    | Investigator   | 0.00            | 100.00          | 0.00            |
| Dutch    | Mother         | 0.00            | 100.00          | 0.00            |
| English  | Target child   | 1.96            | 98.04           | 0.00            |
| English  | Father         | 0.00            | 100.00          | 0.00            |
| English  | Investigator   | 0.00            | 100.00          | 0.00            |
| English  | Mother         | 0.00            | 100.00          | 0.00            |
| English  | Other adults   | 0.00            | 100.00          | 0.00            |
| English  | Other children | 0.00            | 100.00          | 0.00            |
| English  | Remainder      | 0.00            | 100.00          | 0.00            |
| German   | Target child   | 1.42            | 98.58           | 0.00            |
| German   | Father         | 0.66            | 99.34           | 0.00            |
| German   | Investigator   | 3.06            | 96.94           | 0.00            |
| German   | Mother         | 0.25            | 99.75           | 0.00            |
| German   | Other adults   | 0.00            | 100.00          | 0.00            |
| German   | Other children | 0.00            | 100.00          | 0.00            |
| Swedish  | Target child   | 2.50            | 97.50           | 0.00            |
| Swedish  | Father         | 0.00            | 100.00          | 0.00            |
| Swedish  | Mother         | 0.00            | 100.00          | 0.00            |
| Swedish  | Other adults   | 0.00            | 100.00          | 0.00            |

Comparison of AICs for random samples the same number  $n$  of different words ( $n^* = 100$ ). The same format as in Table 17 is adopted.

**5. The range of variation of  $\alpha$ : further support for the evolution of  $\alpha$** 

Tables 26 and 27 show the range of variation of  $\alpha$  for normalization by prefix at lower cut-offs than those considered in the main article,  $T^* = 250$  and  $n^* = 50$ , respectively.

**Table 26. Analysis of the variation the value of the exponent  $\alpha$ :  $T^* = 250$** 

| Language | Role class     | $N$ | $\alpha$        |                 |                 |                 |
|----------|----------------|-----|-----------------|-----------------|-----------------|-----------------|
|          |                |     | <i>min</i>      | <i>mean</i>     | <i>max</i>      | <i>dev</i>      |
| All      | Target child   | 97  | $0.63 \pm 0.06$ | $0.78 \pm 0.13$ | $1.16 \pm 0.93$ | $0.13 \pm 0.17$ |
| All      | Father         | 21  | $0.58 \pm 0.06$ | $0.67 \pm 0.07$ | $0.81 \pm 0.11$ | $0.07 \pm 0.03$ |
| All      | Investigator   | 35  | $0.60 \pm 0.05$ | $0.66 \pm 0.05$ | $0.76 \pm 0.14$ | $0.05 \pm 0.03$ |
| All      | Mother         | 47  | $0.55 \pm 0.04$ | $0.66 \pm 0.05$ | $0.82 \pm 0.12$ | $0.06 \pm 0.03$ |
| All      | Other adults   | 24  | $0.62 \pm 0.07$ | $0.70 \pm 0.05$ | $0.78 \pm 0.08$ | $0.06 \pm 0.04$ |
| All      | Other children | 11  | $0.63 \pm 0.05$ | $0.70 \pm 0.06$ | $0.80 \pm 0.12$ | $0.07 \pm 0.04$ |
| All      | Remainder      | 2   | $0.72 \pm 0.19$ | $0.91 \pm 0.40$ | $1.14 \pm 0.57$ | $0.28 \pm 0.31$ |
| Dutch    | Target child   | 14  | $0.64 \pm 0.07$ | $0.76 \pm 0.04$ | $0.90 \pm 0.05$ | $0.07 \pm 0.02$ |
| Dutch    | Father         | 4   | $0.55 \pm 0.03$ | $0.62 \pm 0.03$ | $0.67 \pm 0.05$ | $0.04 \pm 0.02$ |
| Dutch    | Investigator   | 6   | $0.57 \pm 0.02$ | $0.66 \pm 0.02$ | $0.77 \pm 0.05$ | $0.05 \pm 0.01$ |
| Dutch    | Mother         | 7   | $0.53 \pm 0.02$ | $0.61 \pm 0.03$ | $0.73 \pm 0.07$ | $0.04 \pm 0.01$ |
| English  | Target child   | 54  | $0.61 \pm 0.05$ | $0.76 \pm 0.14$ | $1.23 \pm 1.22$ | $0.14 \pm 0.20$ |
| English  | Father         | 11  | $0.56 \pm 0.04$ | $0.66 \pm 0.04$ | $0.81 \pm 0.08$ | $0.07 \pm 0.02$ |
| English  | Investigator   | 21  | $0.59 \pm 0.05$ | $0.65 \pm 0.03$ | $0.72 \pm 0.04$ | $0.04 \pm 0.02$ |
| English  | Mother         | 26  | $0.55 \pm 0.02$ | $0.65 \pm 0.03$ | $0.82 \pm 0.10$ | $0.06 \pm 0.02$ |
| English  | Other adults   | 15  | $0.61 \pm 0.05$ | $0.69 \pm 0.05$ | $0.77 \pm 0.09$ | $0.07 \pm 0.04$ |
| English  | Other children | 8   | $0.63 \pm 0.05$ | $0.70 \pm 0.07$ | $0.78 \pm 0.12$ | $0.07 \pm 0.05$ |
| English  | Remainder      | 2   | $0.72 \pm 0.19$ | $0.91 \pm 0.40$ | $1.14 \pm 0.57$ | $0.28 \pm 0.31$ |
| German   | Target child   | 24  | $0.66 \pm 0.08$ | $0.84 \pm 0.12$ | $1.18 \pm 0.35$ | $0.17 \pm 0.14$ |
| German   | Father         | 3   | $0.62 \pm 0.10$ | $0.76 \pm 0.13$ | $0.94 \pm 0.11$ | $0.10 \pm 0.03$ |
| German   | Investigator   | 8   | $0.62 \pm 0.05$ | $0.69 \pm 0.09$ | $0.87 \pm 0.25$ | $0.08 \pm 0.06$ |
| German   | Mother         | 9   | $0.55 \pm 0.05$ | $0.69 \pm 0.07$ | $0.90 \pm 0.15$ | $0.09 \pm 0.04$ |
| German   | Other adults   | 5   | $0.60 \pm 0.10$ | $0.68 \pm 0.07$ | $0.78 \pm 0.06$ | $0.05 \pm 0.03$ |
| German   | Other children | 3   | $0.61 \pm 0.03$ | $0.70 \pm 0.01$ | $0.85 \pm 0.13$ | $0.06 \pm 0.02$ |
| Swedish  | Target child   | 5   | $0.62 \pm 0.03$ | $0.78 \pm 0.05$ | $1.04 \pm 0.13$ | $0.10 \pm 0.02$ |
| Swedish  | Father         | 3   | $0.66 \pm 0.07$ | $0.72 \pm 0.02$ | $0.83 \pm 0.08$ | $0.05 \pm 0.03$ |
| Swedish  | Mother         | 5   | $0.61 \pm 0.02$ | $0.69 \pm 0.01$ | $0.79 \pm 0.04$ | $0.05 \pm 0.01$ |
| Swedish  | Other adults   | 4   | $0.68 \pm 0.05$ | $0.74 \pm 0.02$ | $0.82 \pm 0.03$ | $0.04 \pm 0.01$ |

Length normalization by prefix with  $T^* = 250$  is used.  $N$  is the number of individuals analyzed for a given role class and language category that have at least five time points (for consistency with the minimum number of points of the correlation analysis; see Methods). For each individual, four statistics concerning  $\alpha$  are computed: the minimum (*min*), the mean (*mean*), the maximum (*max*) and the standard deviation (*dev*) are calculated over all his/her transcripts. The mean plus/minus 1 standard deviation of these four statistics is shown for each role class and language category (when  $N = 1$ , a standard deviation of 0 is assumed).

**Table 27. Analysis of the variation the value of the exponent  $\alpha$ :  $n^* = 50$** 

| Language | Role class     | $N$ | $\alpha$        |                 |                 |                 |
|----------|----------------|-----|-----------------|-----------------|-----------------|-----------------|
|          |                |     | <i>min</i>      | <i>mean</i>     | <i>max</i>      | <i>dev</i>      |
| All      | Target child   | 101 | $0.47 \pm 0.11$ | $0.70 \pm 0.11$ | $1.01 \pm 0.25$ | $0.15 \pm 0.08$ |
| All      | Father         | 23  | $0.37 \pm 0.10$ | $0.56 \pm 0.09$ | $0.81 \pm 0.15$ | $0.12 \pm 0.04$ |
| All      | Investigator   | 44  | $0.36 \pm 0.08$ | $0.53 \pm 0.07$ | $0.74 \pm 0.19$ | $0.11 \pm 0.05$ |
| All      | Mother         | 47  | $0.32 \pm 0.08$ | $0.54 \pm 0.06$ | $0.84 \pm 0.17$ | $0.11 \pm 0.03$ |
| All      | Other adults   | 35  | $0.44 \pm 0.13$ | $0.58 \pm 0.10$ | $0.74 \pm 0.13$ | $0.10 \pm 0.05$ |
| All      | Other children | 13  | $0.44 \pm 0.08$ | $0.60 \pm 0.10$ | $0.82 \pm 0.20$ | $0.12 \pm 0.04$ |
| All      | Remainder      | 2   | $0.60 \pm 0.33$ | $0.83 \pm 0.42$ | $1.17 \pm 0.54$ | $0.24 \pm 0.19$ |
| Dutch    | Target child   | 14  | $0.48 \pm 0.09$ | $0.69 \pm 0.05$ | $0.91 \pm 0.07$ | $0.11 \pm 0.02$ |
| Dutch    | Father         | 4   | $0.34 \pm 0.10$ | $0.47 \pm 0.06$ | $0.61 \pm 0.11$ | $0.09 \pm 0.04$ |
| Dutch    | Investigator   | 6   | $0.34 \pm 0.04$ | $0.52 \pm 0.03$ | $0.71 \pm 0.06$ | $0.09 \pm 0.02$ |
| Dutch    | Mother         | 7   | $0.28 \pm 0.06$ | $0.47 \pm 0.04$ | $0.65 \pm 0.06$ | $0.08 \pm 0.01$ |
| English  | Target child   | 58  | $0.46 \pm 0.09$ | $0.68 \pm 0.10$ | $0.97 \pm 0.24$ | $0.14 \pm 0.05$ |
| English  | Father         | 12  | $0.34 \pm 0.07$ | $0.57 \pm 0.07$ | $0.85 \pm 0.13$ | $0.13 \pm 0.04$ |
| English  | Investigator   | 28  | $0.36 \pm 0.07$ | $0.51 \pm 0.06$ | $0.70 \pm 0.13$ | $0.09 \pm 0.02$ |
| English  | Mother         | 26  | $0.32 \pm 0.07$ | $0.55 \pm 0.06$ | $0.88 \pm 0.16$ | $0.12 \pm 0.03$ |
| English  | Other adults   | 26  | $0.44 \pm 0.12$ | $0.58 \pm 0.09$ | $0.74 \pm 0.12$ | $0.11 \pm 0.05$ |
| English  | Other children | 10  | $0.46 \pm 0.07$ | $0.60 \pm 0.11$ | $0.78 \pm 0.19$ | $0.12 \pm 0.04$ |
| English  | Remainder      | 2   | $0.60 \pm 0.33$ | $0.83 \pm 0.42$ | $1.17 \pm 0.54$ | $0.24 \pm 0.19$ |
| German   | Target child   | 24  | $0.50 \pm 0.16$ | $0.76 \pm 0.13$ | $1.14 \pm 0.31$ | $0.20 \pm 0.12$ |
| German   | Father         | 4   | $0.41 \pm 0.16$ | $0.59 \pm 0.16$ | $0.87 \pm 0.18$ | $0.13 \pm 0.04$ |
| German   | Investigator   | 10  | $0.34 \pm 0.11$ | $0.56 \pm 0.09$ | $0.89 \pm 0.30$ | $0.16 \pm 0.09$ |
| German   | Mother         | 9   | $0.30 \pm 0.09$ | $0.53 \pm 0.07$ | $0.88 \pm 0.22$ | $0.13 \pm 0.05$ |
| German   | Other adults   | 5   | $0.38 \pm 0.17$ | $0.56 \pm 0.14$ | $0.78 \pm 0.20$ | $0.11 \pm 0.01$ |
| German   | Other children | 3   | $0.39 \pm 0.08$ | $0.59 \pm 0.01$ | $0.94 \pm 0.21$ | $0.14 \pm 0.04$ |
| Swedish  | Target child   | 5   | $0.43 \pm 0.08$ | $0.67 \pm 0.08$ | $1.09 \pm 0.13$ | $0.14 \pm 0.03$ |
| Swedish  | Father         | 3   | $0.47 \pm 0.06$ | $0.61 \pm 0.03$ | $0.79 \pm 0.11$ | $0.09 \pm 0.02$ |
| Swedish  | Mother         | 5   | $0.43 \pm 0.06$ | $0.58 \pm 0.02$ | $0.78 \pm 0.03$ | $0.08 \pm 0.01$ |
| Swedish  | Other adults   | 4   | $0.52 \pm 0.08$ | $0.64 \pm 0.02$ | $0.75 \pm 0.05$ | $0.07 \pm 0.03$ |

Observed vocabulary size normalization by prefix with  $n^* = 50$  is used. The remainder of the methods and the format are the same as in Table 26.

## References

- [1] W. J. Conover. *Practical nonparametric statistics*. Wiley, New York, 1999. 3rd edition.
- [2] H. Akaike. Information theory as an extension of the maximum likelihood principle. In B. N. Petrov and F. Csaki, editors, *Second International Symposium on Information Theory*, pages 267–281. Akademiai Kiado, Budapest, 1973.



- [3] N. Sugiura. Further analysis of the data by Akaike's information criterion and the finite corrections.  
*Communication and Statistics - Theory and Methods*, 7:13–26, 1978.
